## **Adenosine Reduces Sinoatrial Node Cell AP Firing Rate by uncoupling its Membrane and Calcium Clocks**

Ashley N. Wirth, Kenta Tsutsui, Victor A. Maltsev, Edward G. Lakatta\*

Laboratory of Cardiovascular Science, Intramural Research Program, National Institute on Aging, NIH, Biomedical Research Center, 251 Bayview Blvd. Suite 100, Baltimore, MD 21224-6825, USA

**\*Corresponding author:**

Edward G. Lakatta, MD

Email: lakattae@mail.nih.gov

Telephone: 1-410-558-8202

Fax: 1-410-558-8150

**Present address of Ashley N. Wirth:**

School of Medicine, Oregon Health & Science University, 3181 SW Sam Jackson Park Rd, Portland, OR, 97239, USA

**Present address of Kenta Tsutsui:**

Saitama Medical University, Department of Cardiovascular Medicine, 38 Morohongo, Moroyama, Iruma District, Saitama 350-0495, Japan

Key words: sinoatrial node; adenosine; coupled-clock pacemaker system; calcium release; sarcoplasmic reticulum; cardiac arrhythmia; sinus node arrest; sick sinus syndrome.

## ABSTRACT

The spontaneous action potential (AP) firing rate of sinoatrial nodal cells (SANC) is regulated by a system of intracellular  $\text{Ca}^{2+}$  and membrane ion current clocks driven by  $\text{Ca}^{2+}$ -calmodulin-activated adenylyl cyclase-protein kinase A (PKA) signaling. The mean AP cycle length (APCL) and APCL variability inform on the effectiveness of clock coupling. Endogenous ATP metabolite adenosine (ado) binds to adenosine receptors that couple to  $G_i$  protein-coupled receptors, reducing spontaneous AP firing rate via  $G_{\beta\gamma}$  signaling that activates an membrane-clock outward current,  $I_{K\text{ACH}}$ . Ado also inhibits adenylyl cyclase activity via  $G_{i\alpha}$  signaling, impacting cAMP-mediated PKA-dependent protein phosphorylation and intracellular  $\text{Ca}^{2+}$  cycling. We hypothesize that in addition to  $I_{K\text{Ado}}$  activation, ado signaling impacts  $\text{Ca}^{2+}$  via  $G_{i\alpha}$  signaling and that both effects reduce AP firing rate by reducing the effectiveness of the  $\text{Ca}^{2+}$  and membrane clock coupling. To this end, we measured  $\text{Ca}^{2+}$  and membrane potential characteristics in enzymatically isolated single rabbit SANC. 10  $\mu\text{M}$  ado substantially increased both the mean APCL (on average by 43%,  $n=10$ ) and AP beat-to-beat variability from  $5.1\pm 1.7\%$  to  $7.2\pm 2.0\%$  ( $n=10$ ) measured via membrane potential and  $5.0\pm 2.2$  to  $10.6\pm 5.9$  ( $n=40$ ) measured via  $\text{Ca}^{2+}$  (assessed as the coefficient of variability,  $\text{CV}=\text{SD}/\text{mean}$ ). These effects were mediated by hyperpolarization of the maximum diastolic membrane potential (membrane clock effect) and suppression of diastolic spontaneous, local  $\text{Ca}^{2+}$  releases (LCRs) ( $\text{Ca}^{2+}$  clock effect): as LCR size distributions shifted from larger to smaller values, the time of LCR occurrence during diastolic depolarization (LCR period) became prolonged, and the ensemble LCR  $\text{Ca}^{2+}$  signal became reduced. The tight linear relationship of coupling between LCR period to the APCL in the presence of ado “drifted” upward and leftward, i.e. for a given LCR period, APCL was prolonged,

becoming non-linear indicating clock uncoupling. An extreme case of uncoupling occurred at higher ado concentrations ( $>100 \mu\text{M}$ ): small stochastic LCRs of the  $\text{Ca}^{2+}$  clock failed to self-organize and synchronize to the membrane clock, thus creating a failed attempt to generate an AP resulting in arrhythmia and cessation of AP firing. Thus, the effects of ado to activate  $G_{\beta\gamma}$  and  $I_{\text{KACH, Ado}}$  and to activate  $G_{i\alpha}$ , suppressing adenylyl cyclase activity, both contribute to the ado-induced increase in the mean APCL and APCL variability by reducing the fidelity of clock coupling and AP firing rate.

## INTRODUCTION

Cardiac sinoatrial nodal (SAN) pacemaker cells (SANC) generate spontaneous action potentials (APs) that initiate each heartbeat. Adenosine (ado), an endogenous cardiac metabolite, generated via the enzymatic hydrolysis of AMP or S-adenosyl homocysteine (Schrader, 1983; Shen and Kurachi, 1995). Ado concentration increases when ATP becomes reduced during metabolic stress and works to slow heart rate, thereby reducing energy consumption to protect the heart (West and Belardinelli, 1985; Belardinelli et al., 1988).

Ado has been previously shown to slow SAN impulses and delay SAN conduction (Drury and Szent-Gyorgyi, 1929). Applications of ado to single isolated SANC reduce the AP firing rate (Belardinelli et al., 1988; Headrick et al., 2011) via ado-activated  $A_1$  receptor signaling that leads to activation of inhibitory GTP-binding protein to dissociate into its  $G_{i\alpha}$  and  $G_{\beta\gamma}$  subunits. These effects, respectively, result in the inhibition of adenylyl cyclase (AC) and activation of  $I_{\text{KACH}}$  current which hyperpolarizes the SANC membrane potential (Logothetis et al., 1987; Belardinelli et al.,

1988;Shen and Kurachi, 1995). It had been postulated (Belardinelli et al., 1988) and shown directly (Kurachi et al., 1986) that ado and Acetylcholine (Ach), which both activate  $G_{\beta\gamma}$ , target the same  $K^+$  channels ( $I_{K_{Ach,Ado}}$ ). The effects of ado and Ach to slow SANC AP firing rate have been, and continue to be, mainly attributed to this mechanism.

But more recently, evidence has emerged to indicate that SANC AP firing is regulated not solely by surface membrane ion currents, but by a coupled-oscillator system, driven by  $Ca^{2+}$ -calmodulin activated AC-PKA and CaMKII signaling current (Lakatta et al., 2010). An intracellular  $Ca^{2+}$  oscillator or “ $Ca^{2+}$  clock”, the sarcoplasmic reticulum (SR), couples to an ensemble of voltage and time-dependent surface membrane current oscillators “Membrane clock”. The  $Ca^{2+}$  clock generates spontaneous, rhythmic local increases in diastolic  $Ca^{2+}$ , local  $Ca^{2+}$  releases (LCRs), that activate inward  $Na^+/Ca^{2+}$  exchanger current ( $I_{NCX}$ ), which partners with  $I_f$  to initiate activation of diastolic depolarization (Vinogradova et al., 2004). Feed-forward signaling involving low voltage activated  $Ca^{2+}$  channels ( $Ca_v1.3$ ) (Torrente et al., 2016),  $Ca^{2+}$ -induced  $Ca^{2+}$  release (CICR), and continued spontaneous LCRs from the SR form an ensemble  $Ca^{2+}$  signal that accelerates diastolic membrane depolarization via  $I_{NCX}$  activation (Lyashkov et al., 2018). When this self-organized electro-chemical oscillation achieves the membrane potential ( $V_m$ ) depolarized sufficient to open L-type  $Ca^{2+}$  channels, an AP is ignited, which (via CICR) induces a relatively synchronous activation of RyR, resulting in a global cytosolic  $Ca^{2+}$  transient (Fabiato, 1983;Stern et al., 1999). AP firing itself, via its effects to regulate intracellular  $Ca^{2+}$ , the “oscillatory substrate” of the  $Ca^{2+}$  clock, affects  $Ca^{2+}$ -ligand function of proteins of both clocks and thus affects clock coupling (Lyashkov et al., 2009;Maltsev and Lakatta, 2010). The average AP firing rate and AP cycle length (APCL) inform on the fidelity of clock coupling: when

clock coupling decreases, the mean AP firing rate is reduced and the variability of APCL increases (Yaniv et al., 2014b; Moen et al., 2019).

Muscarinic cholinergic receptor activation via  $G_i$  protein activation directly activates  $I_{KAch}$  via  $G_{\beta\gamma}$ , to hyperpolarize the MDP (DiFrancesco and Tromba, 1988; Demir et al., 1999) and, via  $G_{i\alpha}$  activation, inhibits AC activity, reducing cAMP-mediated, PKA-dependent protein phosphorylation (Dessauer et al., 1996; Jurevicius and Fischmeister, 1996; Cabrera-Vera et al., 2003; Okumura et al., 2003; Lyashkov et al., 2009). Accordingly, inhibition of cAMP-PKA signaling in response to cholinergic receptor stimulation has a direct effect to reduce intracellular  $Ca^{2+}$  cycling, reducing Ca-calmodulin activated AC-PKA-CAMKII (Lyashkov et al., 2009). This effect, in conjunction with the activation of  $K^+$  channels, reduces the mean AP firing rate (Lyashkov et al., 2009) and increases AP beat-beat variability (Yaniv et al., 2014a). Reduced AP firing reduces net  $Ca^{2+}$  influx and therefore intracellular  $Ca^{2+}$ , the “oscillatory substrate” of the  $Ca^{2+}$  clock. Thus, Ach reduces functions of the clocks and the effectiveness of the clocks coupling via several intertwined  $Ca^{2+}$  and voltage-dependent mechanisms.

Effects of ado on intracellular  $Ca^{2+}$  cycling and  $Ca^{2+}$  and membrane clock coupling in SANC have not yet been evaluated in SANC. Because ado exerts its effects via a signaling cascade that involves the same  $G_i$  protein coupling as Ach that inhibits adenylyl cyclase activity via a  $G_{i\alpha}$  effect and activates  $K^+$  channels via  $G_{\beta\gamma}$  effect, we hypothesize, that ado, like Ach, effects changes in both intracellular  $Ca^{2+}$  and  $V_m$  that reduces the membrane and  $Ca^{2+}$  clock functions and reduces clock coupling, culminating in AP firing rate reduction.

## METHODS

### Single Cell Preparation

SANC were isolated from male rabbits in accordance with NIH guidelines for the care and use of animals, protocol # 34-LCS-2019 (as previously described) (Vinogradova et al., 2000). New Zealand White rabbits (Charles River Laboratories, USA) weighing 2.8–3.2 Kg were anesthetized with sodium pentobarbital (50–90 mg/kg). The heart was removed quickly and placed in solution containing (in mM): 130 NaCl, 24 NaHCO<sub>3</sub>, 1.2 NaH<sub>2</sub>PO<sub>4</sub>, 1.0 MgCl<sub>2</sub>, 1.8 CaCl<sub>2</sub>, 4.0 KCl, 5.6 glucose equilibrated with 95% O<sub>2</sub> / 5% CO<sub>2</sub> (pH 7.4 at 35°C). The SAN region was cut into small strips (~1.0 mm wide) perpendicular to the crista terminalis and excised as reported previously (Vinogradova et al., 2000). The final SA node preparation, which consisted of SA node strips attached to the small portion of crista terminalis, was washed twice in Ca<sup>2+</sup>-free solution containing (in mM): 140 NaCl, 5.4 KCl, 0.5 MgCl<sub>2</sub>, 0.33 NaH<sub>2</sub>PO<sub>4</sub>, 5 HEPES, 5.5 glucose, (pH=6.9) and incubated on shaker at 35°C for 30 min in the same solution with the addition of elastase type IV (0.6 mg/ml; Sigma, Chemical Co.), collagenase type 2 (0.8 mg/ml; Worthington, NJ, USA), Protease XIV (0.12 mg/ml; Sigma, Chemical Co.), and 0.1% bovine serum albumin (Sigma, Chemical Co.). The SA node preparation was next placed in modified Kraftbruehe (KB) solution, containing (in mM): 70 potassium glutamate, 30 KCl, 10 KH<sub>2</sub>PO<sub>4</sub>, 1 MgCl<sub>2</sub>, 20 taurine, 10 glucose, 0.3 EGTA, and 10 HEPES (titrated to pH 7.4 with KOH), and kept at 4°C for 1h in KB solution containing 50 mg/ml polyvinylpyrrolidone (PVP, Sigma, Chemical Co.). Finally, cells were dispersed from the SA node preparation by gentle pipetting in the KB solution and stored at 4°C.

## High Speed 2D Ca<sup>2+</sup> Signal Imaging

Ca<sup>2+</sup> dynamics within isolated single human SANC were measured by 2D imaging of the fluorescent Ca<sup>2+</sup> indicator, Fluo-4. Cells were loaded with 5  $\mu$ M Fluo-4AM (Thermo Fisher, USA) for 15 minutes at room temperature. Fluo-4AM was subsequently washed out of the chamber with bathing solution contained the following (in mM): NaCl 140, HEPES 5, NaH<sub>2</sub>PO<sub>4</sub>\*H<sub>2</sub>O 0.33, KCl 5.4, MgCl<sub>2</sub> 1.0, glucose 5.5, CaCl<sub>2</sub> 1.8; titrated to pH 7.35 with NaOH. Ca<sup>2+</sup> signals were measured within the ensuing 30 minutes at 35°C  $\pm$ 0.1°C. Temperature was controlled by an Analog TC2BIP 2/3Ch bipolar temperature controller from CellMicroControls (USA), which heated both the glass bottom of the perfusion chamber and the solution entering the chamber (via a pre-heater).

Fluo-4 fluorescence was detected using a high-speed PCO.edge 4.2 CMOS camera (100 frames-second, with an 13.2 mm square sensor of 2048x2048 pixels resolution) mounted on a Zeiss inverted microscope (Carl Zeiss, Inc., Germany) with a x63 oil immersion lens and a fluorescence excitation light source (CoolLED pE-300-W, BioVision Technologies, Inc. PA, USA). Fluo-4 fluorescence excitation (blue light, 470/40 nm) and emission light collection (green light, 525/50 nm) were performed using the Zeiss filter set 38 HE. To avoid phototoxicity, Fluo-4 was excited only for short periods of time (<20 s) (Monfredi et al., 2013; Kim et al., 2018). Data acquisition was performed using PCO camware 64 (PCO AG, Germany).

## Membrane Potential Recording

V<sub>m</sub> was measured in the current clamp configuration using an Axopatch 200B amplifier (Molecular Devices). Patch pipette resistances ranged between 3-5 M $\Omega$ , and pipettes were filled

with a solution containing (in mM): K<sup>+</sup> gluconate 120, NaCl 5, MgATP 5, HEPES 5, KCl 20; titrated to pH 7.2 with KOH. Amphotericin B (320 μM, Sigma-Aldrich A-4888) was added into the pipette solution as the pore-forming agent. Liquid junction potential was calculated by pClamp software (Molecular Devices) and adjusted accordingly.

### **Computational Analysis of LCRs and APs**

We used an in-house custom program ('XYT Event Detector') to objectively, automatically, and rapidly analyze the individual and ensemble behavior of the LCRs (Maltsev et al., 2017). The program yields detailed information about the number, timing, and size of individual LCRs. Specifically, The LCR timing is assessed as 'LCR period' which is the time interval between the peak of the prior AP-induced Ca<sup>2+</sup> transient peak and the onset of the LCR occurrence. The "LCR size" is given as the LCR full propagation path in μm<sup>2</sup>. The computer program also provides the LCR ensemble signal (i.e. the summation of all LCR Ca<sup>2+</sup> signal areas occurring within a given time, Fig. 1D). APs were analyzed by using another in-house custom program "AP analysis" (Lyashkov et al., 2018). In addition to traditional parameters APCL, APD50, MDP, and Take-Off potential, the program also provided AP ignition parameters introduced in (Lyashkov et al., 2018): Ignition duration (Idur), and Time-To-Ignition onset (TTI) (Fig. 1C).

### **Experimental Protocol**

In some cells we measured APs only, and in others we measured Ca<sup>2+</sup> signal only. V<sub>m</sub> and Ca<sup>2+</sup> were also recorded simultaneously in a subset of SANC. Both V<sub>m</sub> and Ca<sup>2+</sup> recordings were



electronically synchronized. The  $V_m$  measurements and 2D  $Ca^{2+}$  signals were obtained before, during, and following washout of  $10\mu M$  ado (Sigma Aldrich, USA). We measured SANC APCL using two parameters: AP intervals or AP-induced  $Ca^{2+}$  transient intervals that were closely correlated ( $R^2=0.99$ , Fig. 1A,B). The rhythmicity of SANC firing was assessed as the coefficient of variation (CV) of AP or  $Ca^{2+}$  transient intervals in time series of AP's or AP-induced  $Ca^{2+}$  transient cycles. The mean LCR period was the average of 3-7 LCR periods at baseline and with ado.

## Statistics

Values are expressed as mean  $\pm$  standard error.  $Ca^{2+}$  and electrophysiological measurements in control were compared to those in the presence of ado by one-way ANOVA, paired  $t$ -test or via Student's  $t$ -test, as indicated in the Figure legends.  $P$  value  $<0.05$  was considered statistically significant.

## RESULTS

### AP Firing Rate and Rhythm

Ado dose-dependently increased AP-induced  $Ca^{2+}$  transient cycle length (Fig. 2, Table 1). Ado, at a concentration near its  $IC_{50}$  ( $10\mu M$ ) (Lou et al., 2014), increased APCL from  $492\pm 88$  to  $687\pm 178$  (Table 2). In response to  $10\mu M$  ado, all rhythmically firing SANC increased APCL, measured via  $V_m$  or  $Ca^{2+}$  signal, and most recovered with washout (Fig. 3). The CV of AP also increased in response to  $10\mu M$  ado from  $5.1\pm 1.7\%$  to  $7.2\pm 2.0\%$  (Table 2). To confirm that the increase in APCL was due to ado effects, time controls of  $Ca^{2+}$  and  $V_m$  measurements were also conducted.

There was no significant time effect on either rate of AP firing or AP-induced  $\text{Ca}^{2+}$  transients' measurement within thirty minutes (Figure 4).

### **Membrane Potential**

Ado prolonged the APCL (Fig. 3A and 3B) confirming prior observations (Belardinelli et al., 1988; Ren et al., 2003). In SANC in which only  $V_m$  was measured, the ado-induced increase in APCL was washable after 10 minutes (Fig. 3B, Table 2). Ado significantly hyperpolarized maximum diastolic potential (MDP) and significantly increased AP amplitude, maximum upstroke velocity ( $dVdt_{\max}$ ), and decreased the mean diastolic depolarization slope (Fig. 3A, Table 2). The significant hyperpolarization of MDP and increases in APCL and  $dVdt_{\max}$  in response to ado are also consistent with previous studies in isolated SANC (Ren et al., 2003). Concurrently, with the prolongation of mean APCL, APCL variability increased (Fig. 3C, Table 2). Time to Ignition Onset (TTI), defined as the time period from the AP peak to the ignition phase onset (Fig. 1C), shown to predict the APCL (Lyashkov et al., 2018) was also markedly prolonged by ado (Table 1). The ignition process itself was also slowed down evidenced by significantly longer  $I_{\text{dur}}$  (Table 1).

### **$\text{Ca}^{2+}$ Transients**

$\text{Ca}^{2+}$  signals were recorded only from rhythmically firing SANC at baseline ( $\text{CV} < 10\%$ ). An example of  $\text{Ca}^{2+}$  signal measurement in a representative cell is shown in Fig. 5A. Ado increased the mean AP-induced  $\text{Ca}^{2+}$  transient cycle length and its cycle-to-cycle variability (Fig. 5, Table 3) to similar extents as for those measured via perforated patch clamp (Fig. 3, Table 2).

## **Effects of Ado on spontaneous, local diastolic Ca<sup>2+</sup> releases**

The results of statistical analysis of LCR characteristics are presented in Table 4 and illustrated in Fig. 6. Ado did not change the mean number of diastolic LCR events (normalized for longer diastolic times) but reduced the mean LCR size, duration, and ensemble LCR Ca<sup>2+</sup> signal. When expressed as a percent of control, ado also reduced the LCR size, duration, and ensemble Ca<sup>2+</sup> signal but also increased the number of LCRs, consistent with the idea that LCRs becomes smaller and less synchronized (i.e. de-synchronized in space and time). With ado, there was an increase in the number and percentage of the smallest LCRs. Correspondingly, there was a decrease in larger LCRs. Ado also prolonged the mean LCR period, consistent with the idea that the period of the coupled-clock system increased.

It has been previously shown that a concurrent increase in beat-to-beat variability (CV) accompanied an increase in the mean AP-induced Ca<sup>2+</sup> transient cycle length and mean LCR period in response to ivabradine, a funny current inhibitor (Yaniv et al., 2014b). The increase in mean AP-induced Ca<sup>2+</sup> transient cycle length and mean LCR period in response to ado were also accompanied by the increased beat-to-beat variability (CV) of the LCR period and APCL (Fig. 5C, Tables 3 and 4).

## **Clock uncoupling in response to Ado**

The effect of ado on LCR characteristics resulted in a reduction of the self-organized growth rate of diastolic LCR ensemble Ca<sup>2+</sup> signal (Fig. 7). At baseline, the majority of SANC showed a strong correlation between LCR period and AP-induced Ca<sup>2+</sup> transient cycle length, indicating

robust clock coupling in most cells (Fig. 7C). In the presence of ado, the mean LCR period and  $\text{Ca}^{2+}$  transient cycle length increased from baseline but maintained the correlation between LCR period and AP-induced  $\text{Ca}^{2+}$  transient cycle length (Fig. 7C). For a few cells that deviated from this correlation with ado, as the mean APCL increased in response to ado, a given LCR period was linked to a longer APCL than at baseline (Fig. 7C), reflecting a reduction of the effectiveness of LCR signals to impact the timing of the next AP. This reduced effectiveness manifested as a ‘missed attempt’ at synchronizing between the  $\text{Ca}^{2+}$  and membrane clock to generate an AP (Fig. 7D). The cells that deviated rightward and upward the most from the correlation between LCR period and AP-induced  $\text{Ca}^{2+}$  transient cycle length with ado experienced the most uncoupling.

### **Simultaneous measurements of membrane potential and $\text{Ca}^{2+}$**

The aforementioned measurements of  $\text{Ca}^{2+}$  and  $V_m$  were made in different cells. To directly assess the effect of ado on clock coupling, simultaneous membrane and  $\text{Ca}^{2+}$  measurements were performed within the same cell prior to and following ado superfusion (Movie S1, Fig. 8). The prolongation and increased variability of APCL in the presence of ado occurred concurrently with a reduced growth rate of the LCR ensemble  $\text{Ca}^{2+}$  signal (Fig. 9, Panel B). The AP ignition times, LCR periods, and APCLs of five cells in which  $V_m$  and  $\text{Ca}^{2+}$  were measured simultaneously are illustrated in Fig. 9. The relationship between TTI and APCL in these five cells is illustrated in Fig. 9A. Note how TTI and APCL increase in the presence of ado and maintain their relationship. TTI informs on the LCR period, even for extremely uncoupled cells ( $r^2=0.9$ ) (Fig. 9C) because the

growth of the ensemble LCR  $\text{Ca}^{2+}$  signal, via its effect to increase more inward  $I_{\text{NCX}}$ , initiates the ignition phase recorded as TTI (Lyashkov et al., 2018). Note a concurrent shift in TTI and LCR period at baseline and in the presence of ado (Fig. 9C). Therefore, the APCL depends on the LCR period (Fig. 9B) and that relationship informs on the fidelity of clock coupling: with ado, the clock coupling, reflected in the LCR period, was reduced.

### **$V_m$ - $\text{Ca}^{2+}$ Phase-Plane Diagrams**

Phase-plane diagrams of  $V_m$  versus  $\text{Ca}^{2+}$  permit closer inspection of simultaneous time-dependent changes occurred in  $V_m$  and  $\text{Ca}^{2+}$ .  $V_m$  and  $\text{Ca}^{2+}$  throughout the AP cycle inform on the electrochemical gradient oscillation that underlies each AP cycle (Lakatta et al., 2003). The phase-plane diagrams of the AP and  $\text{Ca}^{2+}$  recordings prior to and during ado superfusion are illustrated in Fig. 10. Effects of ado on both clock parameters (Figs 3 and 5, Tables 2, 3, and 4) would be expected to alter the electrochemical gradient oscillation characteristics exemplified by the  $V_m$ - $\text{Ca}^{2+}$  diagram.

Point 1 in Fig. 10 Panels A and B marks the MDP in control and ado. The time from the MDP to ignition onset (labeled 2 in Panels A and B) occurred at a similar  $V_m$  and lower global  $\text{Ca}^{2+}$  in the presence of ado than at baseline. The AP ignition phase onset occurred earlier at baseline (160 msec) than in the same cells in the presence of ado (300 msec) (Fig. 10, Panel A). Progressive  $\text{Ca}^{2+}$  ensemble self-organization and its effect on  $V_m$  and on the global  $\text{Ca}^{2+}$  signal caused the ignition process to proceed from 2 to 3, the take off potential of the AP, in Panels A and B. The take off potential marks the end of the ignition phase (labeled 3 in Panels A and B).

The time from ignition onset to TOP (take off potential) is the duration of the ignition phase.

Ado prolonged the time-to-ignition (MDP to ignition phase onset) from 160msec at baseline to 300msec with ado. The ignition phase duration decreased with ado from 400 msec at baseline to 310 msec with ado (Panel A). Peak  $V_m$  and  $Ca^{2+}$  transient amplitudes (labeled 4 in Panels A and B) occur at later times with ado (640 msec) than baseline (610msec) (Panel A). AP repolarization and  $Ca^{2+}$  transient decay initiates sooner at baseline than during ado (Panel A). Peak  $V_m$  amplitude, labeled 4 in Panels A and B, occurred at a lower  $Ca^{2+}$  level but later in time in ado (640msec) than baseline (610msec) (Fig. 10A and B). The time to 90% restitution were 890msec at baseline and 960msec with ado at Point 6 (Panel A and B).

Note that the degree of hysteresis indicates the overall uncoupling of  $Ca^{2+}$  and  $V_m$  signals during an AP cycle. This hysteresis is greater with ado than at baseline. Whereas the difference of the duration of the AP ignition period is 560 to 610 msec (1.1 times greater) and time to 90% decay is 890msec and 960msec (1.08 times greater), the main difference to the time domain and percent differences between ado and baseline is the time-to-ignition onset. The major factor increasing hysteresis between ado and control in the phase-plane diagram is due to a 2-fold increase in the time- to-ignition onset in ado (300 msec) and control (160 msec). The time-to-ignition onset is regulated by the pumping of  $Ca^{2+}$  into the SR. This rate of  $Ca^{2+}$  cycling into the SR to achieve the threshold required for spontaneous LCRs to occur and self-organize, is the degree to which it influences  $V_m$  time-to-ignition onset.

## DISCUSSION

The present study builds upon the known effects of ado to slow SANC AP firing and change  $V_m$  characteristics (Belardinelli et al., 1988). However, more recent studies have demonstrated that it is a coupled membrane and  $Ca^{2+}$  clock system that regulates SANC AP firing rate and rhythm.  $Ca^{2+}$  is an important oscillatory substrate involved in crosstalk between surface membrane and  $Ca^{2+}$  clocks (Fig. 11). The availability of intracellular  $Ca^{2+}$  is regulated by the balance of  $Ca^{2+}$  influx and efflux from the cell, which decrease in response to decreased clock protein phosphorylation (Fig. 12). The present study is the first to measure and demonstrate that ado reduces and slows down intracellular  $Ca^{2+}$  cycling by reducing mean LCR size and duration and increased mean LCR period. The fidelity of clock coupling stems from the tight relationship between  $Ca^{2+}$  cycling and  $V_m$ . Thus, ado modulates  $Ca^{2+}$  and membrane clocks, resulting in ado-induced clock uncoupling.

The present study demonstrates that ado increases APCL and APCL variability of SANC by directly and indirectly effecting both membrane and  $Ca^{2+}$  clocks. Ado directly activates  $I_{KACH}$ , Ado to hyperpolarize SANC and slow firing rate, thus directly effecting the membrane clock. Ado also has indirect effects on the membrane clock via  $G_{i\alpha}$  (Fig. 11) to reduce intracellular protein phosphorylation and SR  $Ca^{2+}$  cycling to further slow SANC firing rate. Ado exerts direct effects on the  $Ca^{2+}$  clock by decreasing intracellular phosphorylation of  $Ca^{2+}$  signaling proteins (like Ach). Ado indirectly effects the  $Ca^{2+}$  clock via its effect on the membrane clock to slow SANC firing rate, commensurate a decrease in net SR  $Ca^{2+}$  influx and intracellular  $Ca^{2+}$ , i.e. oscillatory substrate for  $Ca^{2+}$  clock. Thus, changes in SANC firing rate were due to direct effects on both

clocks and indirect effects of both clocks on each other. Numerous feedbacks and feedforwards of this process occurred until a new equilibrium was reached.

Mechanisms by which *ado* slows AP firing and increases beat-to-beat variability are similar to cholinergic signaling via Ach. Ach and *ado* have different membrane receptors, but likely target the same  $I_{K_{Ach}}$  channels via  $G_{\beta\gamma}$ , hyperpolarizing the cell membrane and extending the time of diastolic depolarization (Kurachi et al., 1986). Ach, like *ado*, activates  $G_{i\alpha}$  to inhibit AC activity and reduce cAMP-mediated, PKA dependent phosphorylation of downstream  $Ca^{2+}$  cycling proteins targets (DiFrancesco and Tromba, 1988; Dessauer et al., 1996; Lyashkov et al., 2009). While the present study did not directly measure *ado*'s effects on phosphorylation of clock proteins, it has been previously demonstrated that cholinergic receptor stimulation, like *ado*, decreases intracellular cAMP and phosphorylation via inhibition  $I_{K_{Ach, Ado}}$  (Lyashkov et al., 2009). Since *ado* acts via the same signaling pathway, its effects on intracellular  $Ca^{2+}$  cycling observed in this study likely result from the same changes to intracellular phosphorylation.

Other studies have demonstrated that because the membrane and  $Ca^{2+}$  clocks are tightly coupled, specific inhibition of a specific molecule in one clock that reduces SANC AP firing rate indirectly affects the function of the other clock and affects clock coupling fidelity. For example, specific  $I_f$  inhibition by ivabradine not only reduces SANC firing rate and increases AP cycle variability, but also indirectly reduces intracellular  $Ca^{2+}$  (Yaniv et al., 2014a). Thus, the overall  $Ca^{2+}$  effect of ivabradine, and likely *ado*, to reduce AP firing rate involves effects on both clocks as well as clock coupling.



Cyclopiazonic acid (CPA) is a specific  $\text{Ca}^{2+}$  clock inhibitor that selectively and reversibly inhibits SERCA  $\text{Ca}^{2+}$ -ATPase (Goeger et al., 1988; Nelson et al., 1994). CPA been shown to dose-dependently decrease SANC firing rate by suppressing SERCA-mediated  $\text{Ca}^{2+}$  pumping (Vinogradova et al., 2010). The slowing of SANC firing with CPA was reflected by decreased SANC LCR size and number and increased LCR period (Vinogradova et al., 2010). The CPA-induced changes in LCR characteristics delayed the occurrence of LCR activated  $\text{Na}^{+}$ - $\text{Ca}^{2+}$  current and reduced its amplitude, contributing to a decreased mean diastolic depolarization slope (Vinogradova et al., 2010). Thus, while CPA directly modified only  $\text{Ca}^{2+}$  clock function via the suppression of SERCA function, the collective effect on M and  $\text{Ca}^{2+}$  clock characteristics resulted in the APCL prolongation of the SANC firing. These results can be interpreted to indicate that any disturbances of the  $\text{Ca}^{2+}$  clock by ado in our experiments would also influence both clocks and their coupling, ultimately reducing SANC firing rate.

Adenosine is known to be released in response to metabolic stress such as hypoxia and inflammation (Grenz et al., 2011; Idzko et al., 2014). Its effect on clock coupling in vitro may explain its function in vivo. Upregulation of  $\text{A}_1\text{R}$  protein expression and increased plasma levels of ado are also found to be associated with heart failure and ischemia (Newman et al., 1984; Funaya et al., 1997; Lou et al., 2014). Evidence is accumulating that adenosine contributes to SAN dysfunction in heart failure (Lou et al., 2014). New insights, through 2D optical mapping of the intact SAN, have shown that failing SAN is increasingly sensitive to ado (Lou et al., 2014; Li et al., 2017). This increased influence of ado has been found to contribute to SAN dysfunction by amplifying intrinsic conduction abnormalities such as atrial fibrillation and sinus exit block (Li et al., 2017). Given the significant contribution of adenosine to SAN dysfunction, its effect on

isolated SANC in vitro shown here may have some bearing on arrhythmias in the context of heart failure and ischemia.

## **STUDY LIMITATIONS**

The AP-induced  $\text{Ca}^{2+}$  transient cycle length was, on average, 13% higher in cells loaded with  $\text{Ca}^{2+}$  indicator Fluo-4 than cells not loaded with Fluo-4. This may reflect  $\text{Ca}^{2+}$  indicator buffering of SANC measured via  $\text{Ca}^{2+}$  transients. Nevertheless, ado effects on mean AP-induced  $\text{Ca}^{2+}$  transient and APCL variability were similar to the effects of ado on APCL and APCL variability recorded via perforated patch clamp in the absence of  $\text{Ca}^{2+}$  indicator.

## **DATA AVAILABILITY STATEMENT**

The raw data supporting the conclusions of this article will be made available by the authors, without undue reservation.

## **ETHICS STATEMENT**

The animal study was reviewed and approved by the Animal Care and Use Committee of the National Institutes of Health.

## **AUTHOR CONTRIBUTIONS**

ANW and KT: performed the experiments and analyzed the data. ANW and EGL: drafted the manuscript. ANW, VAM, EGL: critically revised the manuscript for important intellectual content, analysis, and interpretation of the data. VM and EGL: project planning, analysis and interpretation of the data, conception and design of the experiments. All authors approved the submitted version.

## **FUNDING**

This research was supported by the Intramural Research Program of the National Institutes of Health, National Institute on Aging.

## **SUPPLEMENTARY MATERIAL**

The Supplementary Material for this article can be found online at <https://www.frontiersin.org>

It includes supplementary Movie S1. The movie includes two videos of Ca<sup>2+</sup> signals recorded at baseline and in the presence of ado and respective plots of time series of whole-cell cytosolic Ca<sup>2+</sup>, Membrane potential, and LCR ensemble signal.

## Figure legends

Figure 1. A. Action potentials and AP-Induced  $\text{Ca}^{2+}$  transients are highly correlated in SANC in which both  $\text{Ca}^{2+}$  and  $V_m$  were simultaneously measured (17 cycles measured simultaneously). B, example of a simultaneous  $V_m$  and  $\text{Ca}^{2+}$  recording. C and D. Illustrate  $V_m$  and  $\text{Ca}^{2+}$  parameters measured in this study.

Figure 2. Adenosine slows the firing rate of rhythmically firing SANC in a dose-response manner. The  $\text{IC}_{50}$  for our dose response curve was 31  $\mu\text{M}$  adenosine. (n=4 for 100nm and 1 $\mu\text{M}$  adenosine, n=5 for 10 $\mu\text{M}$  adenosine, and n=7 for 100 $\mu\text{M}$  adenosine). The data of firing rate response were normalized to be between 0% and 100% of baseline and fitted to Variable slope model using GraphPad program [https://www.graphpad.com/guides/prism/latest/curve-fitting/reg\\_dr\\_inhibit\\_normalized\\_variable.htm](https://www.graphpad.com/guides/prism/latest/curve-fitting/reg_dr_inhibit_normalized_variable.htm). The equation for this fitting function was:  
$$Y=100/(1+10^{((\text{LogIC50}-X)*\text{HillSlope}))}$$

Figure 3. A, an example of a cell that increased APCL from 577ms at baseline 1009ms with adenosine and recovered to 597ms with washout (washout not shown). B, Statistical analysis of adenosine effect: SANC action potential cycle length (APCL) increased with adenosine and recovered with washout in SANC (n=14). C, APCL and coefficient of variation (CV) increased with adenosine. \*p<0.05 via one-way repeated measures ANOVA.

Figure 4. Time controls of  $\text{Ca}^{2+}$  and electrophysiology measurements show that SANC action potential cycle length (APCL) and coefficient of variation (CV) do not change with time.

Repeated measures ANOVAs of  $\text{Ca}^{2+}$  and  $V_m$  measurements showed there was no significant time effect on SANC firing rate and CV within twenty minutes. Based on this data, all experiments were performed within twenty minutes.

Figure 5. A, an example of a cell that increased APCL from 480ms at baseline 888ms with adenosine and recovered to 648ms with washout (washout not shown). B, SANC AP-induced  $\text{Ca}^{2+}$  transient cycle length increased with adenosine and recovered partially with washout.

(n=46). C, SANC AP-Induced  $\text{Ca}^{2+}$  transient cycle length and coefficient of variation (CV) increased with adenosine \* $p < 0.05$  via one-way repeated measures ANOVA.

Figure 6. Histograms of LCR size (A) and LCR duration (B), and mean LCR period (C) percentage distributions in all rhythmic SANC before and in the presence of adenosine (n=34). Mean LCR period was the averaged LCR period of 3-7 cycles at baseline and with adenosine for each SANC.

Mean LCR period also increased in response to adenosine.

Figure 7. A, an example of a rhythmically firing SANC that decreases in rate of LCR ensemble growth in response to adenosine. There is an overall decrease in global cytosolic  $\text{Ca}^{2+}$  with adenosine compared to baseline. Panel B depicts the average LCR ensemble growth rate of 5 cycles at baseline and with ado. The average LCR ensemble growth rate decreased to 42% of

baseline with adenosine. This decrease reflects the changes in intracellular  $\text{Ca}^{2+}$  availability, manifesting in changes to LCR parameters. This results in an extended time period of  $\text{Ca}^{2+}$  cycling between AP-induced  $\text{Ca}^{2+}$  transients. Panel C, the correlation between mean LCR Period (3-7 beats) and AP-induced  $\text{Ca}^{2+}$  transient cycle length is reduced at longer cycle lengths. At baseline, there is a strong correlation between APCL and LCR period, indicating robust clock coupling (n=35). Adenosine, in the same population of cells, the mean APCL and LCR period increased for many cells. For a subset of cells, mean APCL increased more than mean LCR period, indicating reduced fidelity of clock coupling indicated by the orange circles that digress up and leftward from the linear trendline (dashed line). The linear trendline includes baseline and ado values. Panel D, an example of a SANC with ado where LCR ensemble growth propagation was insufficient and failed to generate an AP, resulting in clock uncoupling and a 'failed AP attempt'.

Figure 8. A, simultaneous  $V_m$  and  $\text{Ca}^{2+}$  recordings of a rhythmically firing SANC at baseline that fires with decreased rhythmicity in response to 10  $\mu\text{M}$  Ado. B, the rate of LCR ensemble growth is steeper at baseline (blue line) and decreases in response to adenosine (magenta line). The asterisk indicates the baseline and ado cycle lengths measured in Figure 8A.

Figure 9. Relationships between key parameters of the coupled-clock system in control (baseline) and in the presence of adenosine in SANC in which  $\text{Ca}^{2+}$  and  $V_m$  were measured simultaneously. The LCR period informs on the APCL because the LCR period informs on the

time-to-AP-ignition onset. Both LCR period and Time-to-AP-ignition onset increase with adenosine.

Figure 10. A, Phase  $V_m$ - $Ca^{2+}$  relationship. A, one AP cycle (\* in figure 5) prior to (baseline) and during adenosine (Ado) superfusion in which  $V_m$  and  $Ca^{2+}$  were measured simultaneously. B, phase  $V_m$ - $Ca^{2+}$  diagram depicting the relationship between  $V_m$  and global cytosolic  $Ca^{2+}$  during several AP cycles (electrochemical gradient oscillations) at baseline (blue) and with adenosine (orange); 4 consecutive cycles from Figure 5 are shown. Numbers 1-5 indicate the times during the AP cycles in Panel A.

Figure 11. Simplified schematic of the coupled system of membrane ion current oscillators and  $Ca^{2+}$  oscillators (Coupled-clock system) operative within sinoatrial nodal cells (SANC). The system provides robust and flexible AP firing rates. Constitutively active  $Ca^{2+}$ -AC-cAMP-PKA signaling intrinsic to SANC, that is activated by  $Ca^{2+}$  oscillations, couples to an ensemble of electrogenic surface membrane molecules (current oscillators). AC, adenylyl cyclase; cAMP, cyclic AMP; PKA, protein kinase A;  $A_1R$ , adenosine  $A_1$  receptor;  $GI_\alpha$ , GI protein alpha subunit;  $G_{\beta\gamma}$ , GI protein beta gamma subunit; RyR, ryanodine receptor; SERCA, sarco-endoplasmic reticulum  $Ca^{2+}$ -ATPase; PLB, phospholamban; SR, Sarcoplasmic reticulum; CaMKII,  $Ca^{2+}$ /calmodulin-dependent protein kinase II;  $I_K$ , delayed rectifier  $K^+$  current;  $I_{KACH,Ado}$ , Acetylcholine/Adenosine-activated  $K^+$  current;  $I_f$ , HCN currents;  $I_{CaL}$ , L-type  $Ca^{2+}$  current;  $I_{NCX}$ ,  $Na^+/Ca^{2+}$  currents; and  $I_{NaKATPase}$ ,  $Na^+/K^+$  pump.

Figure 12. A schematic for SANC clock coupling/uncoupling. Clocks are coupled in the awake basal state, in response to physiologic stress (beta-adrenergic stimulation) coupling increases and beat-to-beat variability is reduced. In physiologic responses to vagal stimulation or adenosine, the clocks become partially uncoupled and the APCL becomes prolonged. These effects become more exaggerated as Gi coupled stimulation increases at higher drug concentrations.

## References

- Belardinelli, L., Giles, W.R., and West, A. (1988). Ionic mechanisms of adenosine actions in pacemaker cells from rabbit heart. *J Physiol* 405, 615-633. doi: 10.1113/jphysiol.1988.sp017352.
- Cabrera-Vera, T.M., Vanhauwe, J., Thomas, T.O., Medkova, M., Preininger, A., Mazzoni, M.R., and Hamm, H.E. (2003). Insights into G protein structure, function, and regulation. *Endocr Rev* 24, 765-781.
- Demir, S.S., Clark, J.W., and Giles, W.R. (1999). Parasympathetic modulation of sinoatrial node pacemaker activity in rabbit heart: a unifying model. *Am J Physiol* 276, H2221-2244.
- Dessauer, C.W., Posner, B.A., and Gilman, A.G. (1996). Visualizing signal transduction: receptors, G-proteins, and adenylate cyclases. *Clin Sci (Lond)* 91, 527-537.
- Difrancesco, D., and Tromba, C. (1988). Muscarinic control of the hyperpolarization-activated current (if) in rabbit sino-atrial node myocytes. *J Physiol* 405, 493-510. doi: 10.1113/jphysiol.1988.sp017344.
- Drury, A.N., and Szent-Gyorgyi, A. (1929). The physiological activity of adenine compounds with especial reference to their action upon the mammalian heart. *J Physiol* 68, 213-237. doi: 10.1113/jphysiol.1929.sp002608.
- Fabiato, A. (1983). Calcium-induced release of calcium from the cardiac sarcoplasmic reticulum. *Am J Physiol* 245, C1-14.
- Funaya, H., Kitakaze, M., Node, K., Minamino, T., Komamura, K., and Hori, M. (1997). Plasma adenosine levels increase in patients with chronic heart failure. *Circulation* 95, 1363-1365. doi: 10.1161/01.cir.95.6.1363.
- Goeger, D.E., Riley, R.T., Dorner, J.W., and Cole, R.J. (1988). Cyclopiazonic acid inhibition of the Ca<sup>2+</sup>-transport ATPase in rat skeletal muscle sarcoplasmic reticulum vesicles. *Biochem Pharmacol* 37, 978-981. doi: 10.1016/0006-2952(88)90195-5.
- Grenz, A., Homann, D., and Eltzschig, H.K. (2011). Extracellular adenosine: a safety signal that dampens hypoxia-induced inflammation during ischemia. *Antioxid Redox Signal* 15, 2221-2234. doi: 10.1089/ars.2010.3665.



- Headrick, J.P., Peart, J.N., Reichelt, M.E., and Haseler, L.J. (2011). Adenosine and its receptors in the heart: regulation, retaliation and adaptation. *Biochim Biophys Acta* 1808, 1413-1428. doi: 10.1016/j.bbame.2010.11.016.
- Idzko, M., Ferrari, D., and Eltzschig, H.K. (2014). Nucleotide signalling during inflammation. *Nature* 509, 310-317. doi: 10.1038/nature13085.
- Jurevicius, J., and Fischmeister, R. (1996). Acetylcholine inhibits Ca<sup>2+</sup> current by acting exclusively at a site proximal to adenylyl cyclase in frog cardiac myocytes. *J Physiol* 491 ( Pt 3), 669-675. doi: 10.1113/jphysiol.1996.sp021248.
- Kim, M.S., Maltsev, A.V., Monfredi, O., Maltseva, L.A., Wirth, A., Florio, M.C., Tsutsui, K., Riordon, D.R., Parsons, S.P., Tagirova, S., Ziman, B.D., Stern, M.D., Lakatta, E.G., and Maltsev, V.A. (2018). Heterogeneity of calcium clock functions in dormant, dysrhythmically and rhythmically firing single pacemaker cells isolated from SA node. *Cell Calcium* 74, 168-179. doi: 10.1016/j.ceca.2018.07.002.
- Kurachi, Y., Nakajima, T., and Sugimoto, T. (1986). On the mechanism of activation of muscarinic K<sup>+</sup> channels by adenosine in isolated atrial cells: involvement of GTP-binding proteins. *Pflugers Arch* 407, 264-274. doi: 10.1007/BF00585301.
- Lakatta, E.G., Maltsev, V.A., Bogdanov, K.Y., Stern, M.D., and Vinogradova, T.M. (2003). Cyclic variation of intracellular calcium: a critical factor for cardiac pacemaker cell dominance. *Circ Res* 92, e45-50.
- Lakatta, E.G., Maltsev, V.A., and Vinogradova, T.M. (2010). A coupled SYSTEM of intracellular Ca<sup>2+</sup> clocks and surface membrane voltage clocks controls the timekeeping mechanism of the heart's pacemaker. *Circ Res* 106, 659-673.
- Li, N., Hansen, B.J., Csepe, T.A., Zhao, J., Ignozzi, A.J., Sul, L.V., Zakharkin, S.O., Kalyanasundaram, A., Davis, J.P., Biesiadecki, B.J., Kilic, A., Janssen, P.M.L., Mohler, P.J., Weiss, R., Hummel, J.D., and Fedorov, V.V. (2017). Redundant and diverse intranodal pacemakers and conduction pathways protect the human sinoatrial node from failure. *Sci Transl Med* 9. doi: 10.1126/scitranslmed.aam5607.
- Logothetis, D.E., Kurachi, Y., Galper, J., Neer, E.J., and Clapham, D.E. (1987). The beta gamma subunits of GTP-binding proteins activate the muscarinic K<sup>+</sup> channel in heart. *Nature* 325, 321-326. doi: 10.1038/325321a0.
- Lou, Q., Hansen, B.J., Fedorenko, O., Csepe, T.A., Kalyanasundaram, A., Li, N., Hage, L.T., Glukhov, A.V., Billman, G.E., Weiss, R., Mohler, P.J., Gyorke, S., Biesiadecki, B.J., Carnes, C.A., and Fedorov, V.V. (2014). Upregulation of adenosine A1 receptors facilitates sinoatrial node dysfunction in chronic canine heart failure by exacerbating nodal conduction abnormalities revealed by novel dual-sided intramural optical mapping. *Circulation* 130, 315-324. doi: 10.1161/CIRCULATIONAHA.113.007086.
- Lyashkov, A.E., Behar, J., Lakatta, E.G., Yaniv, Y., and Maltsev, V.A. (2018). Positive Feedback Mechanisms among Local Ca Releases, NCX, and I<sub>CaL</sub> Ignite Pacemaker Action Potentials. *Biophys J* 114, 1176-1189. doi: 10.1016/j.bpj.2017.12.043.
- Lyashkov, A.E., Vinogradova, T.M., Zahanich, I., Li, Y., Younes, A., Nuss, H.B., Spurgeon, H.A., Maltsev, V.A., and Lakatta, E.G. (2009). Cholinergic receptor signaling modulates spontaneous firing of sinoatrial nodal cells via integrated effects on PKA-dependent Ca<sup>2+</sup> cycling and I<sub>KACH</sub>. *Am J Physiol Heart Circ Physiol* 297, H949-H959.
- Maltsev, A.V., Parsons, S.P., Kim, M.S., Tsutsui, K., Stern, M.D., Lakatta, E.G., Maltsev, V.A., and Monfredi, O. (2017). Computer algorithms for automated detection and analysis of local Ca<sup>2+</sup> releases in spontaneously beating cardiac pacemaker cells. *PLoS One* 12, e0179419.

- Maltsev, V.A., and Lakatta, E.G. (2010). A novel quantitative explanation of G protein-coupled receptor modulation of sinoatrial cell automaticity via interactions of Ca clock and membrane voltage clock *Biophys J* 98, Supplement 1, 103a (Abstract).
- Moen, J.M., Matt, M.G., Ramirez, C., Tarasov, K.V., Chakir, K., Tarasova, Y.S., Lukyanenko, Y., Tsutsui, K., Monfredi, O., Morrell, C.H., Tagirova, S., Yaniv, Y., Huynh, T., Pacak, K., Ahmet, I., and Lakatta, E.G. (2019). Overexpression of a Neuronal Type Adenylyl Cyclase (Type 8) in Sinoatrial Node Markedly Impacts Heart Rate and Rhythm. *Front Neurosci* 13, 615. doi: 10.3389/fnins.2019.00615.
- Monfredi, O., Maltseva, L.A., Spurgeon, H.A., Boyett, M.R., Lakatta, E.G., and Maltsev, V.A. (2013). Beat-to-beat variation in periodicity of local calcium releases contributes to intrinsic variations of spontaneous cycle length in isolated single sinoatrial node cells. *PLoS One* 8, e67247.
- Nelson, E.J., Li, C.C., Bangalore, R., Benson, T., Kass, R.S., and Hinkle, P.M. (1994). Inhibition of L-type calcium-channel activity by thapsigargin and 2,5-t-butylhydroquinone, but not by cyclopiazonic acid. *Biochem J* 302 ( Pt 1), 147-154.
- Newman, W.H., Grossman, S.J., Frankis, M.B., and Webb, J.G. (1984). Increased myocardial adenosine release in heart failure. *J Mol Cell Cardiol* 16, 577-580. doi: 10.1016/s0022-2828(84)80645-8.
- Okumura, S., Kawabe, J., Yatani, A., Takagi, G., Lee, M.C., Hong, C., Liu, J., Takagi, I., Sadoshima, J., Vatner, D.E., Vatner, S.F., and Ishikawa, Y. (2003). Type 5 adenylyl cyclase disruption alters not only sympathetic but also parasympathetic and calcium-mediated cardiac regulation. *Circ Res* 93, 364-371.
- Ren, L.M., Li, J.X., Shi, C.X., and Zhao, D. (2003). Electrophysiologic effects of adenosine triphosphate on rabbit sinoatrial node pacemaker cells via P1 receptors. *Acta Pharmacol Sin* 24, 943-947.
- Schrader, J. (1983). Metabolism of Adenosine and Sites of Production in the Heart, in *Regulatory Function of Adenosine. Proceedings of the International Symposium on Adenosine, Charlottesville, Virginia, June 7-11, 1982*, R.M. Berne, T.W. Rall, and R. Rubio, Editors. Springer US: Boston, MA. p. 133-156.
- Shen, W.K., and Kurachi, Y. (1995). Mechanisms of adenosine-mediated actions on cellular and clinical cardiac electrophysiology. *Mayo Clin Proc* 70, 274-291. doi: 10.4065/70.3.274.
- Stern, M.D., Song, L.S., Cheng, H., Sham, J.S., Yang, H.T., Boheler, K.R., and Rios, E. (1999). Local control models of cardiac excitation-contraction coupling. A possible role for allosteric interactions between ryanodine receptors. *J Gen Physiol* 113, 469-489.
- Torrente, A.G., Mesirca, P., Neco, P., Rizzetto, R., Dubel, S., Barrere, C., Sinegger-Brauns, M., Striessnig, J., Richard, S., Nargeot, J., Gomez, A.M., and Mangoni, M.E. (2016). L-type Cav1.3 channels regulate ryanodine receptor-dependent Ca<sup>2+</sup> release during sino-atrial node pacemaker activity. *Cardiovasc Res* 109, 451-461. doi: 10.1093/cvr/cvw006.
- Vinogradova, T.M., Brochet, D.X., Sirenko, S., Li, Y., Spurgeon, H., and Lakatta, E.G. (2010). Sarcoplasmic reticulum Ca<sup>2+</sup> pumping kinetics regulates timing of local Ca<sup>2+</sup> releases and spontaneous beating rate of rabbit sinoatrial node pacemaker cells. *Circ Res* 107, 767-775.
- Vinogradova, T.M., Zhou, Y.Y., Bogdanov, K.Y., Yang, D., Kuschel, M., Cheng, H., and Xiao, R.P. (2000). Sinoatrial node pacemaker activity requires Ca<sup>2+</sup>/calmodulin-dependent protein kinase II activation. *Circ Res* 87, 760-767.
- Vinogradova, T.M., Zhou, Y.Y., Maltsev, V., Lyashkov, A., Stern, M., and Lakatta, E.G. (2004). Rhythmic ryanodine receptor Ca<sup>2+</sup> releases during diastolic depolarization of sinoatrial pacemaker cells do not require membrane depolarization. *Circ Res* 94, 802-809.
- West, G.A., and Belardinelli, L. (1985). Correlation of sinus slowing and hyperpolarization caused by adenosine in sinus node. *Pflugers Arch* 403, 75-81. doi: 10.1007/BF00583285.
- Yaniv, Y., Ahmet, I., Liu, J., Lyashkov, A.E., Guiriba, T.R., Okamoto, Y., Ziman, B.D., and Lakatta, E.G. (2014a). Synchronization of sinoatrial node pacemaker cell clocks and its autonomic modulation

impart complexity to heart beating intervals. *Heart Rhythm* 11, 1210-1219. doi: 10.1016/j.hrthm.2014.03.049.

Yaniv, Y., Lyashkov, A.E., Sirenko, S., Okamoto, Y., Guiriba, T.R., Ziman, B.D., Morrell, C.H., and Lakatta, E.G. (2014b). Stochasticity intrinsic to coupled-clock mechanisms underlies beat-to-beat variability of spontaneous action potential firing in sinoatrial node pacemaker cells. *J Mol Cell Cardiol* 77, 1-10. doi: 10.1016/j.yjmcc.2014.09.008.

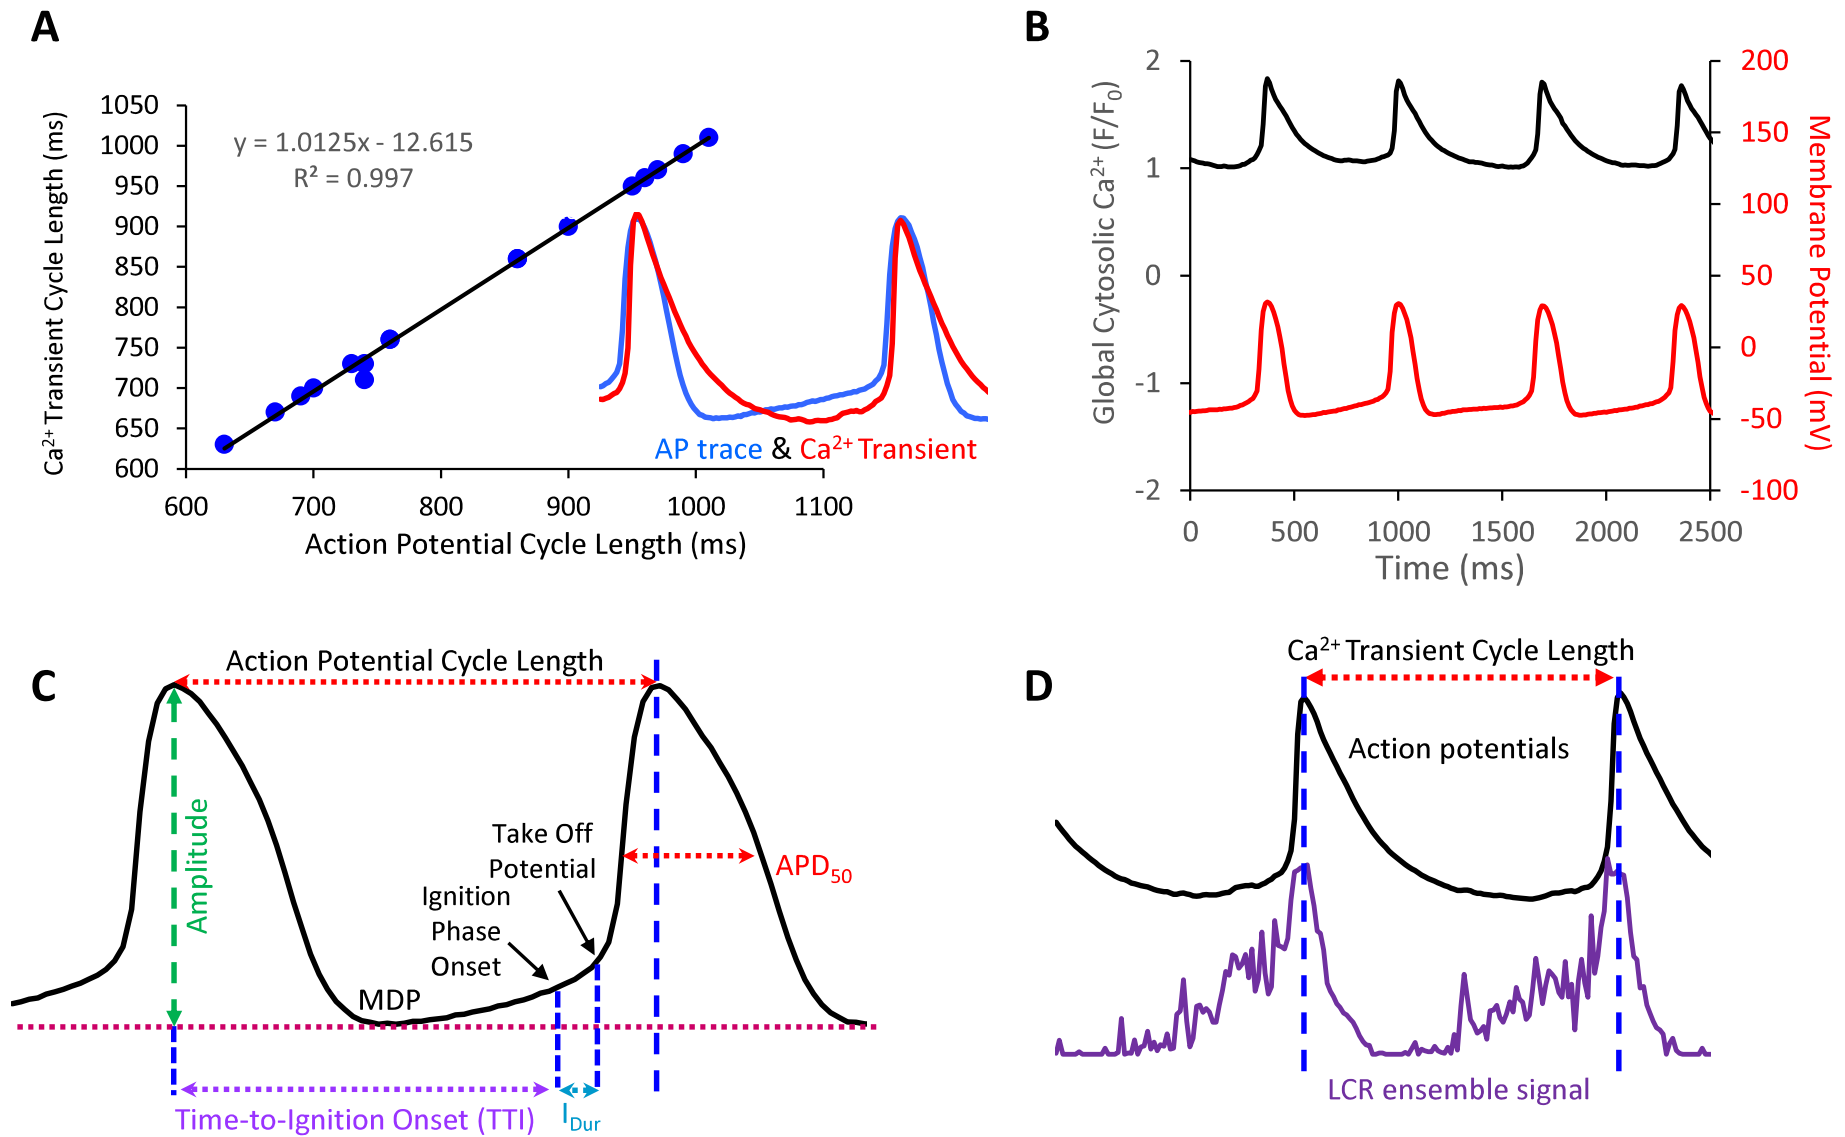

Figure 1

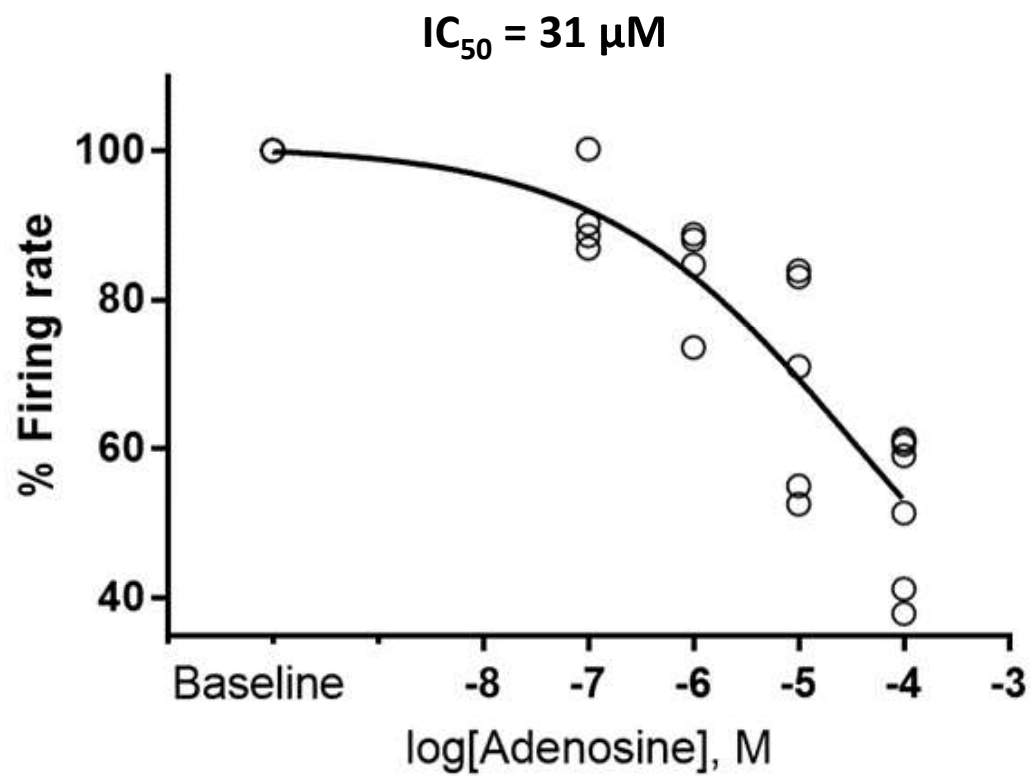

Figure 2

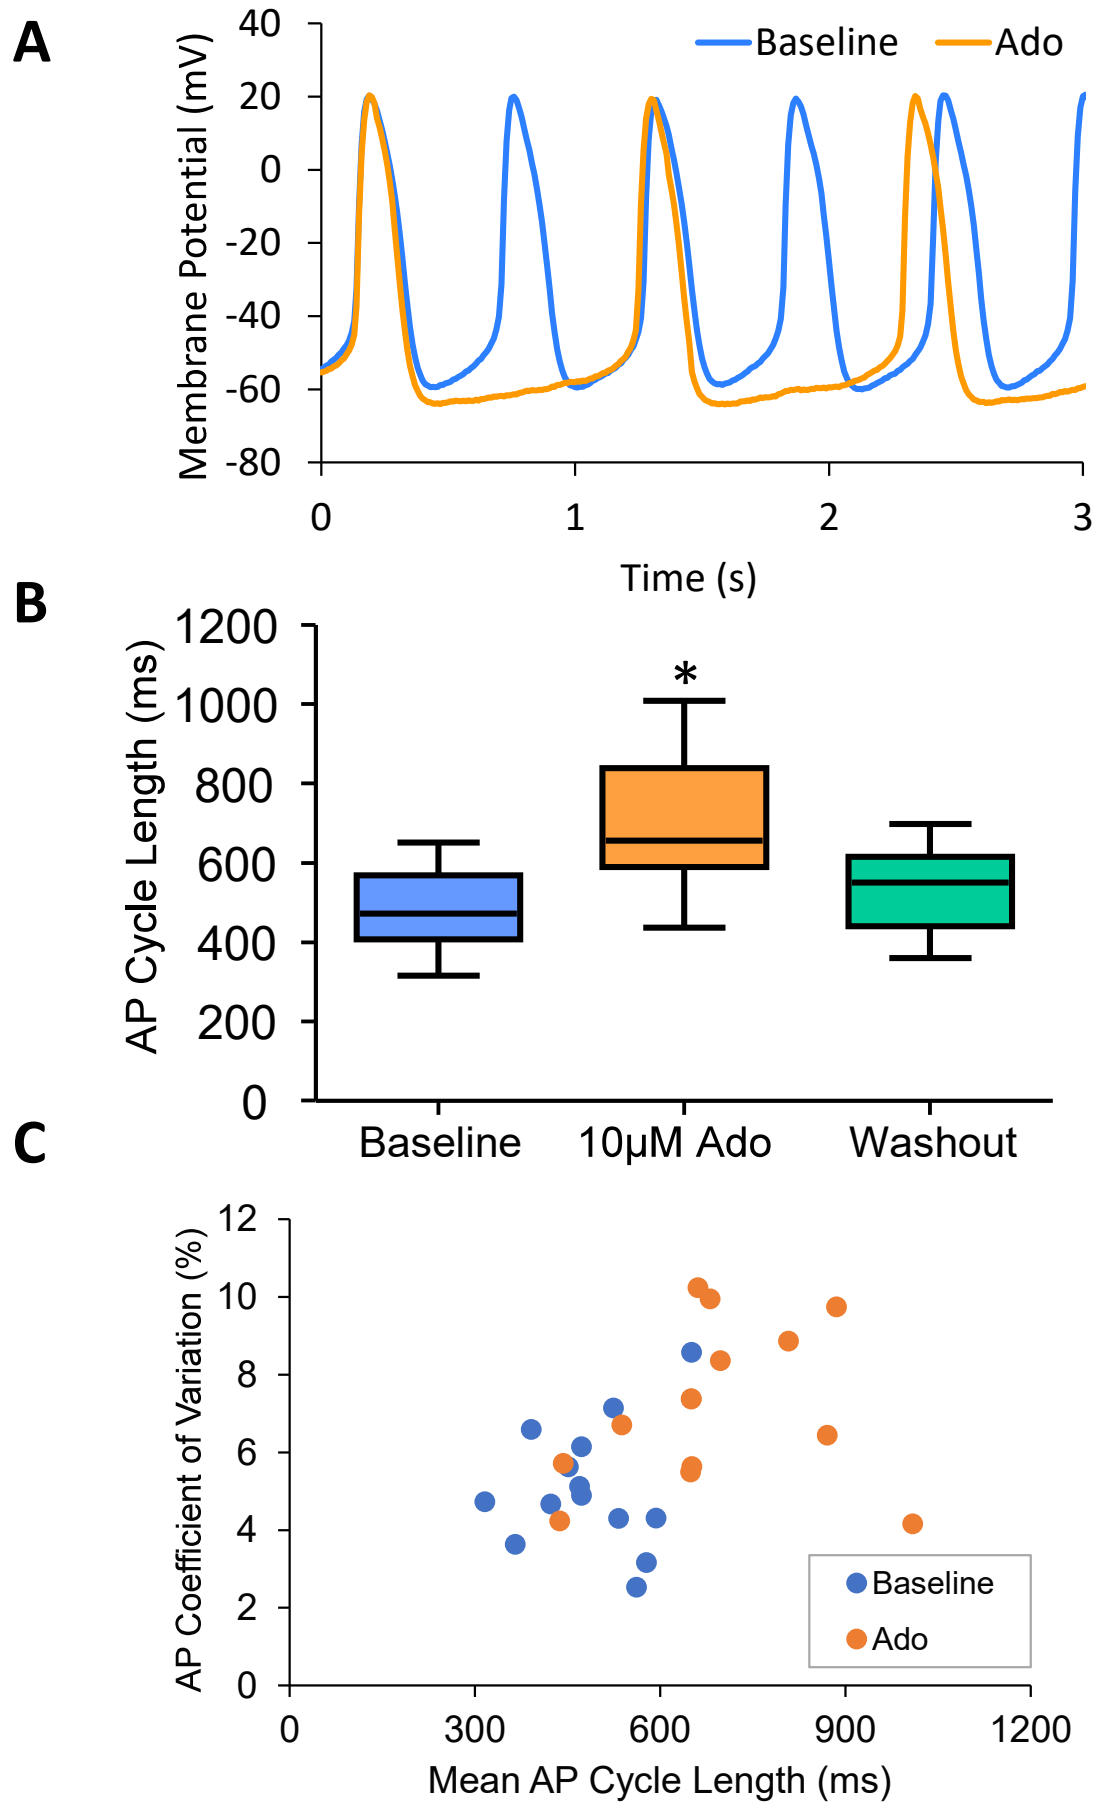

Figure 3

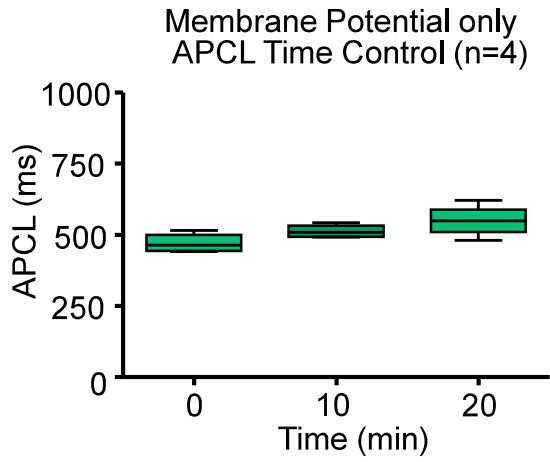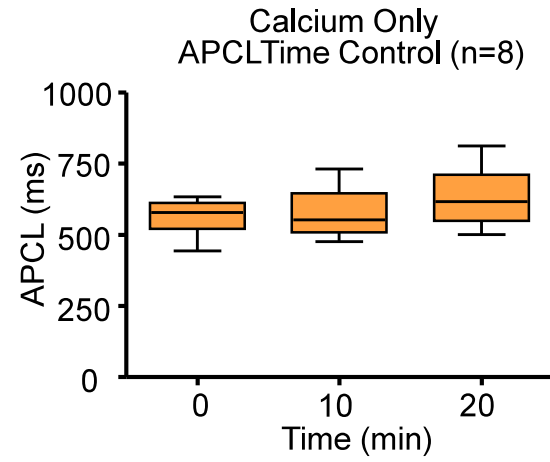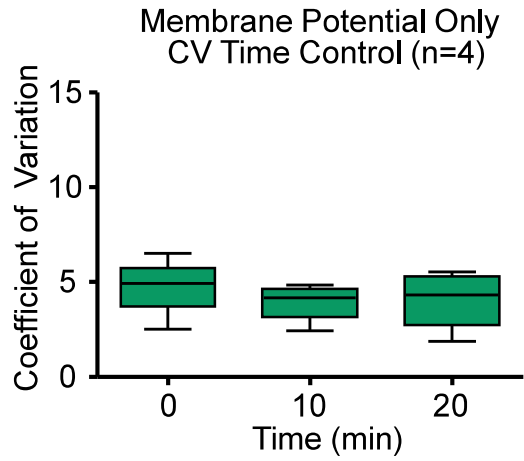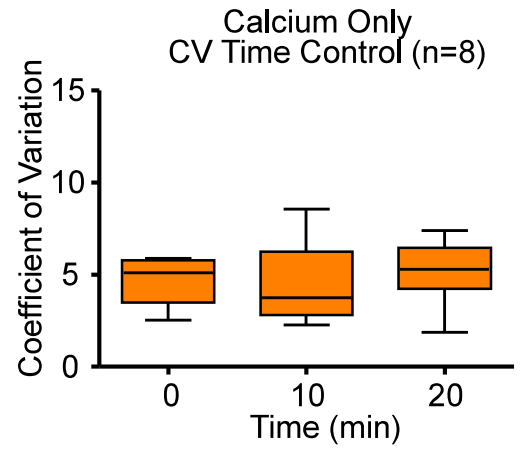

Figure 4

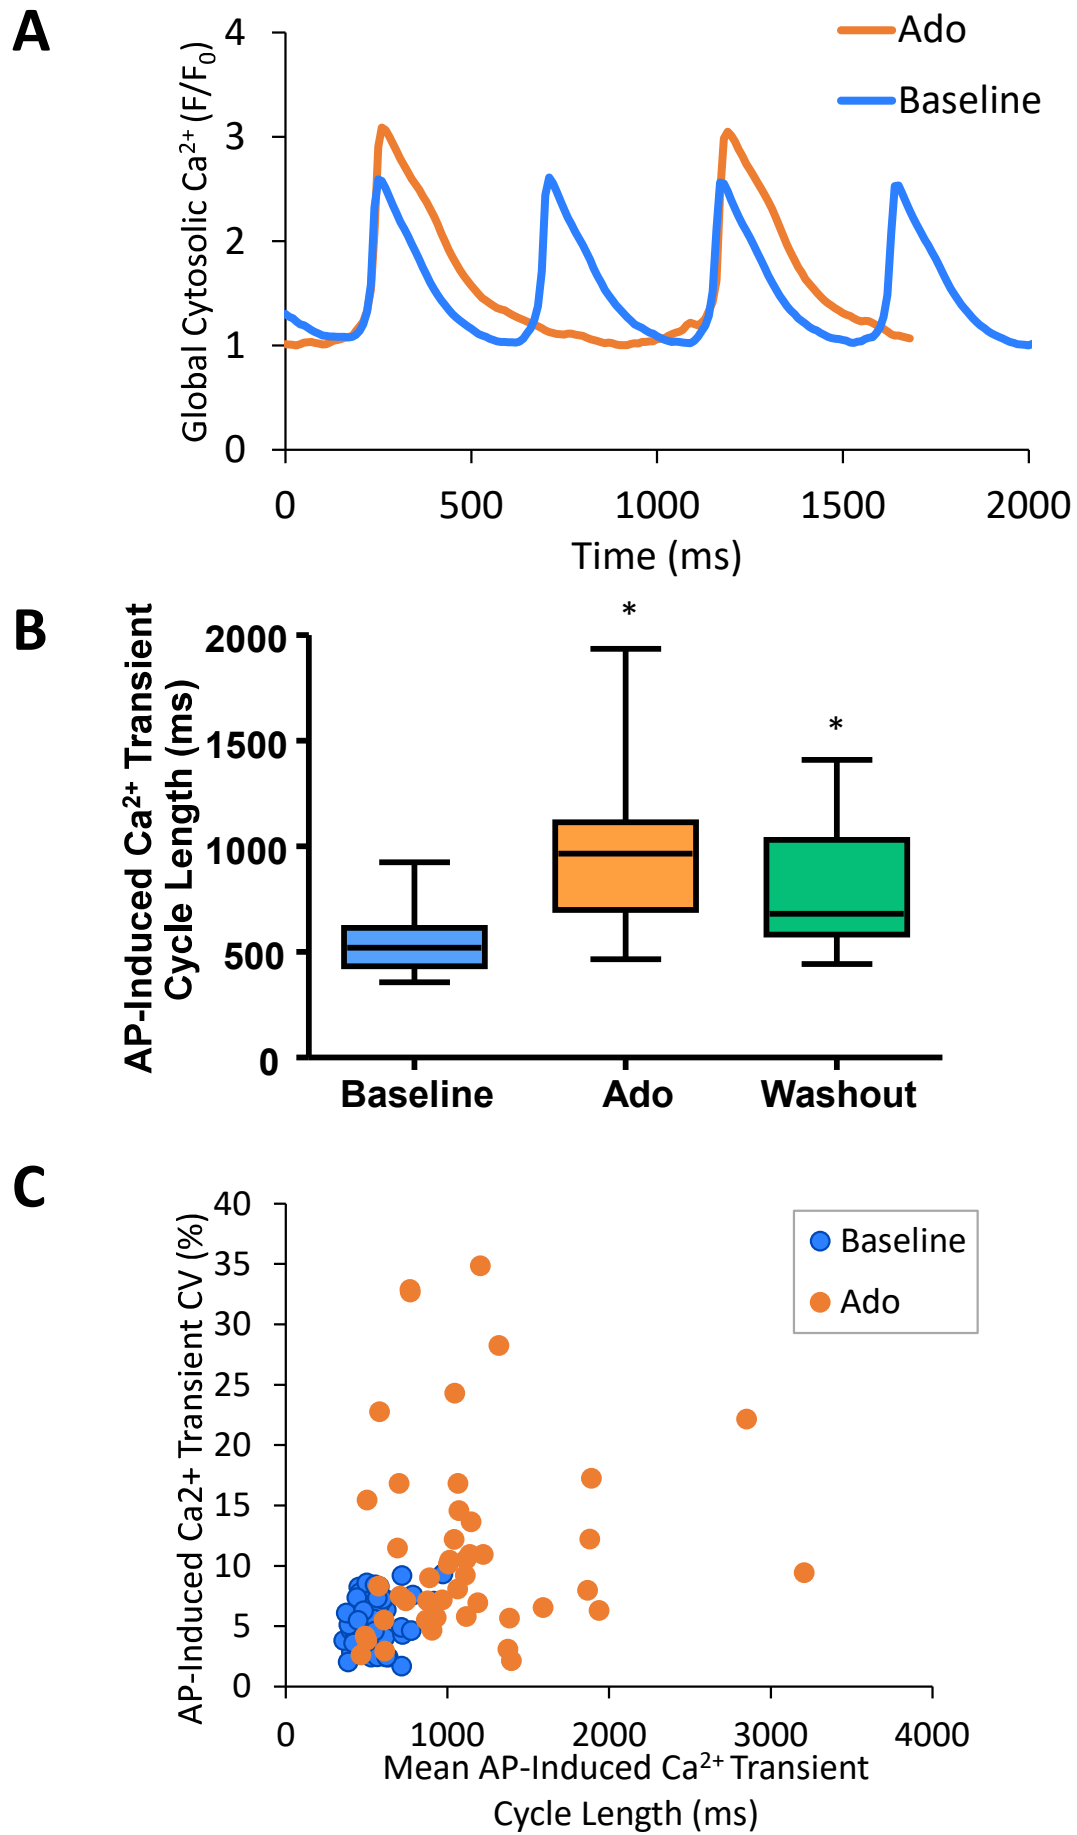

Figure 5



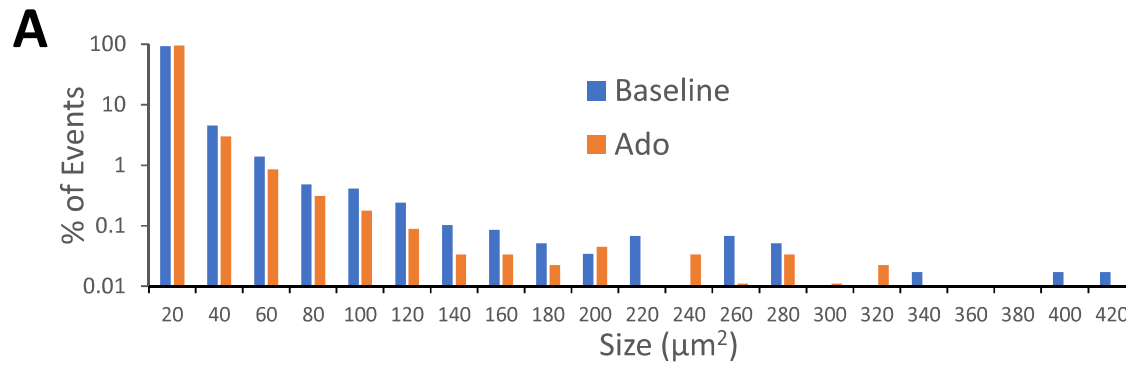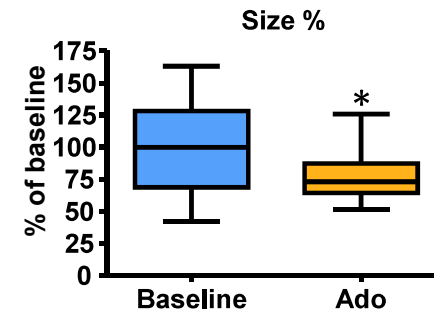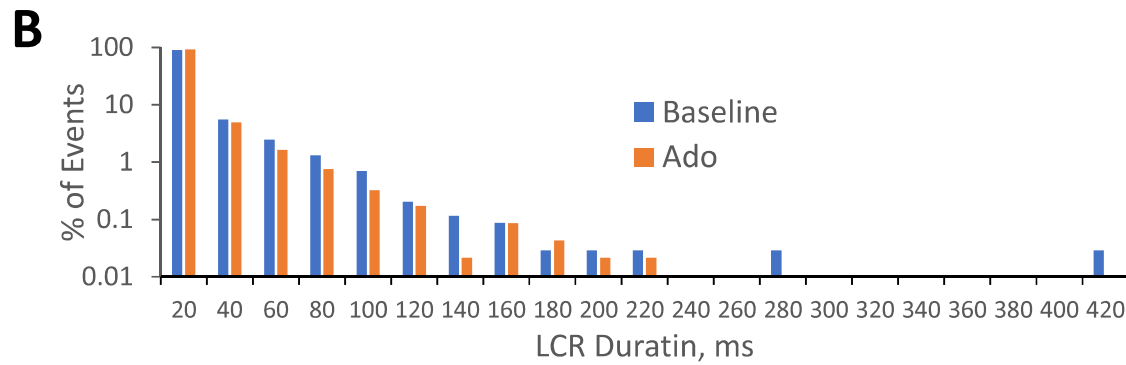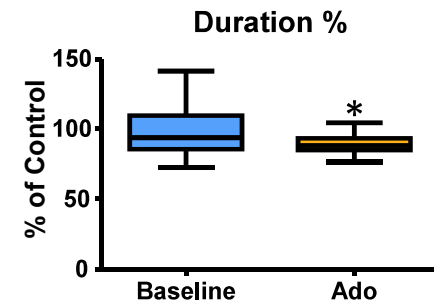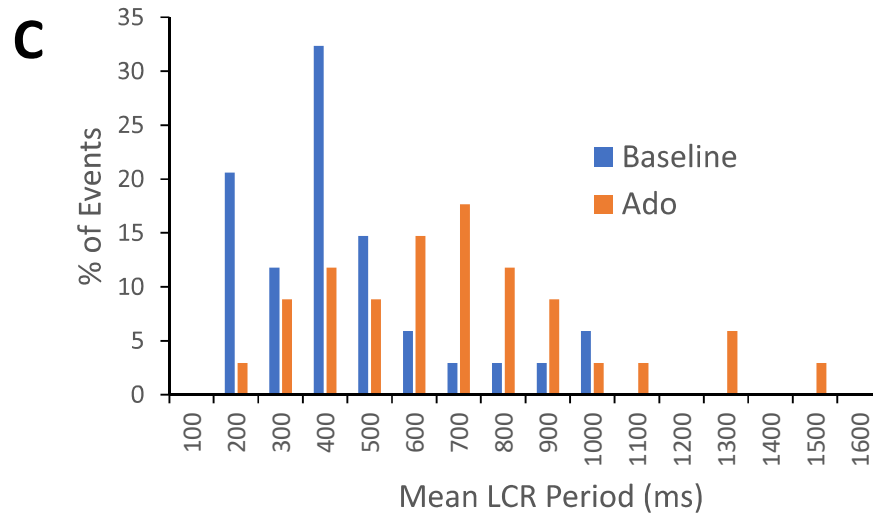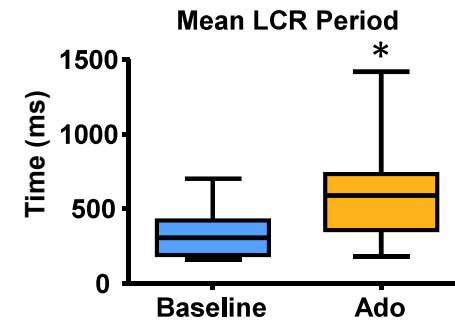

Figure 6

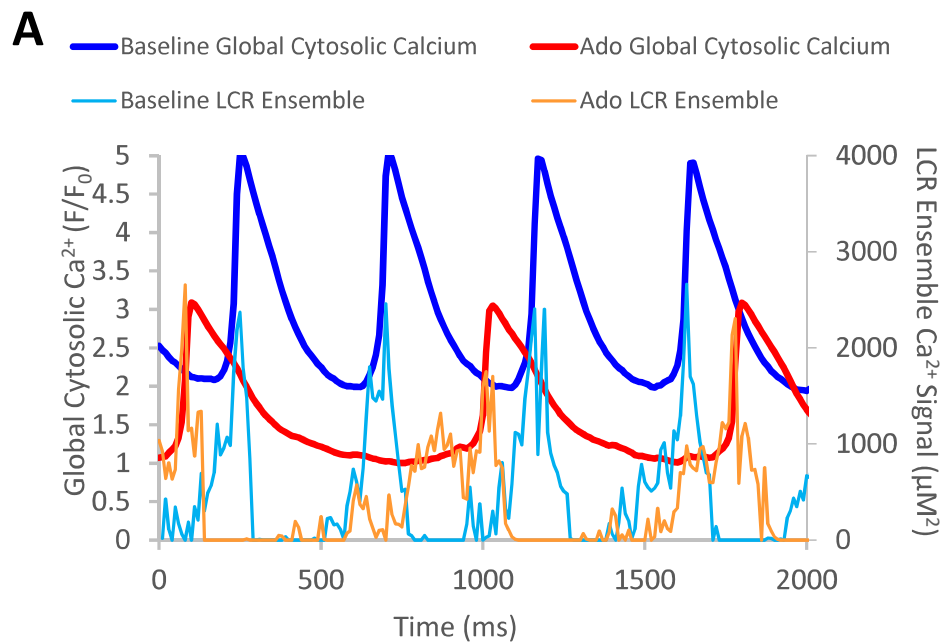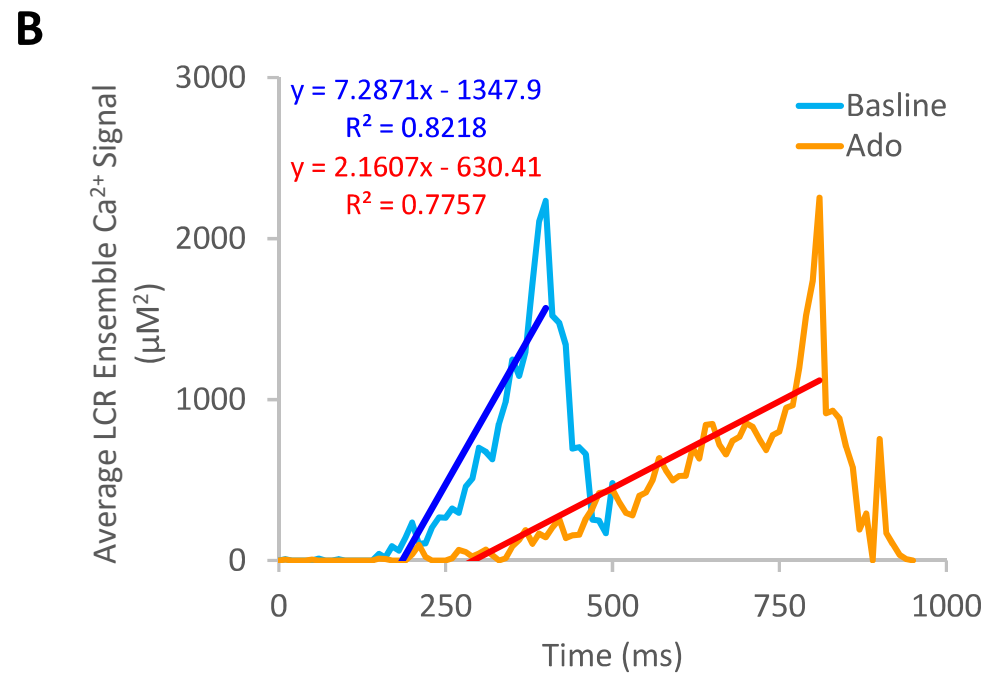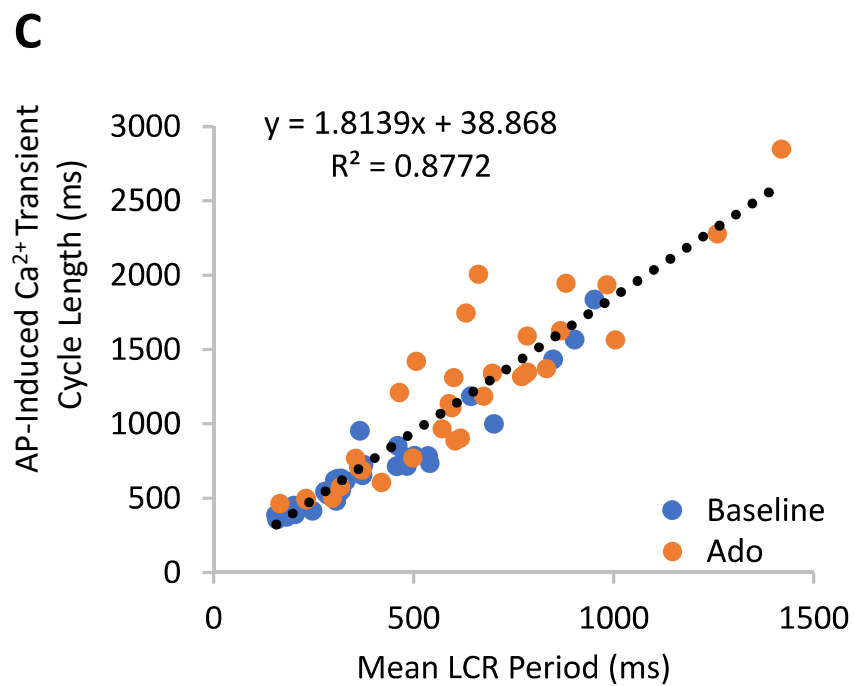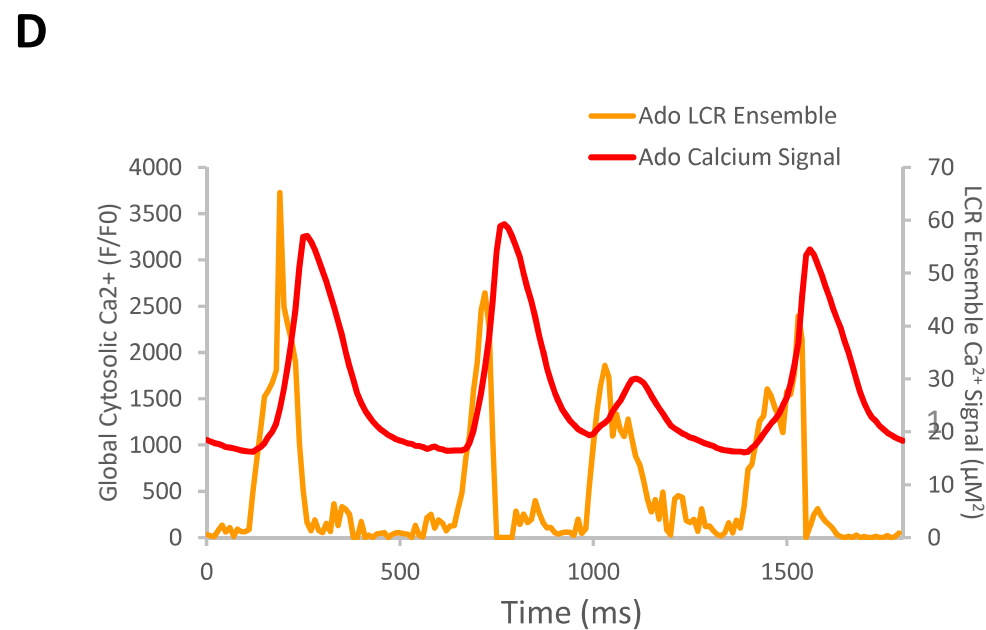

Figure 7

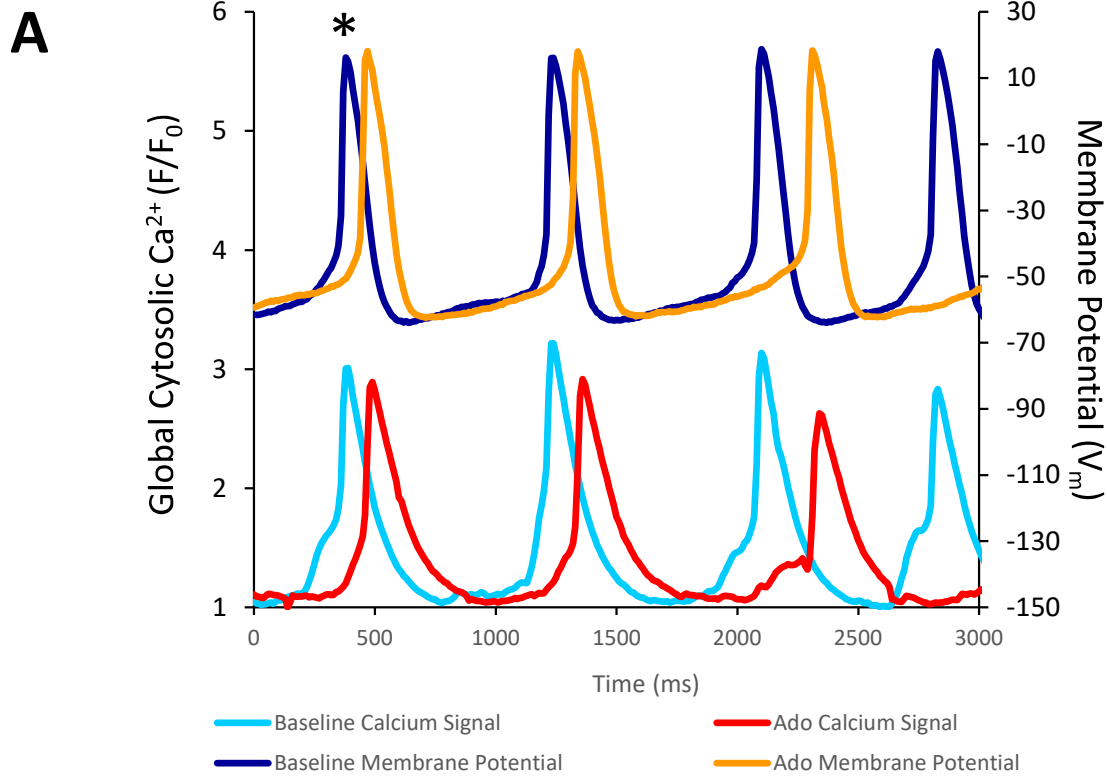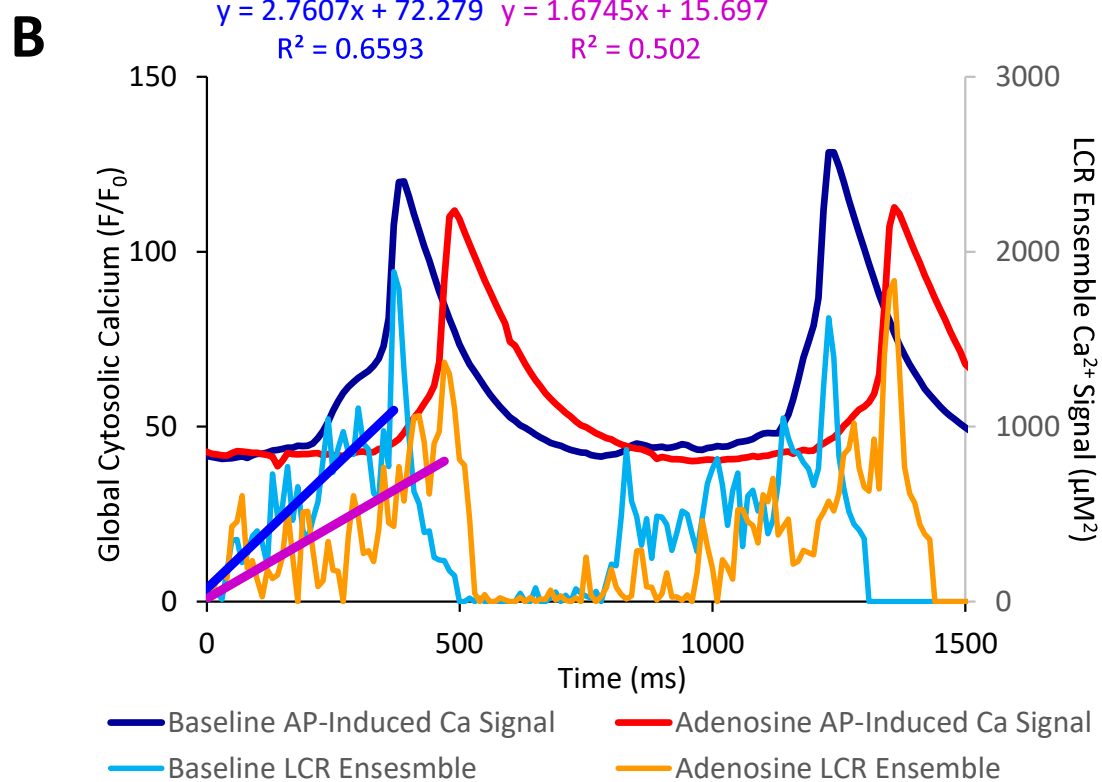

Figure 8

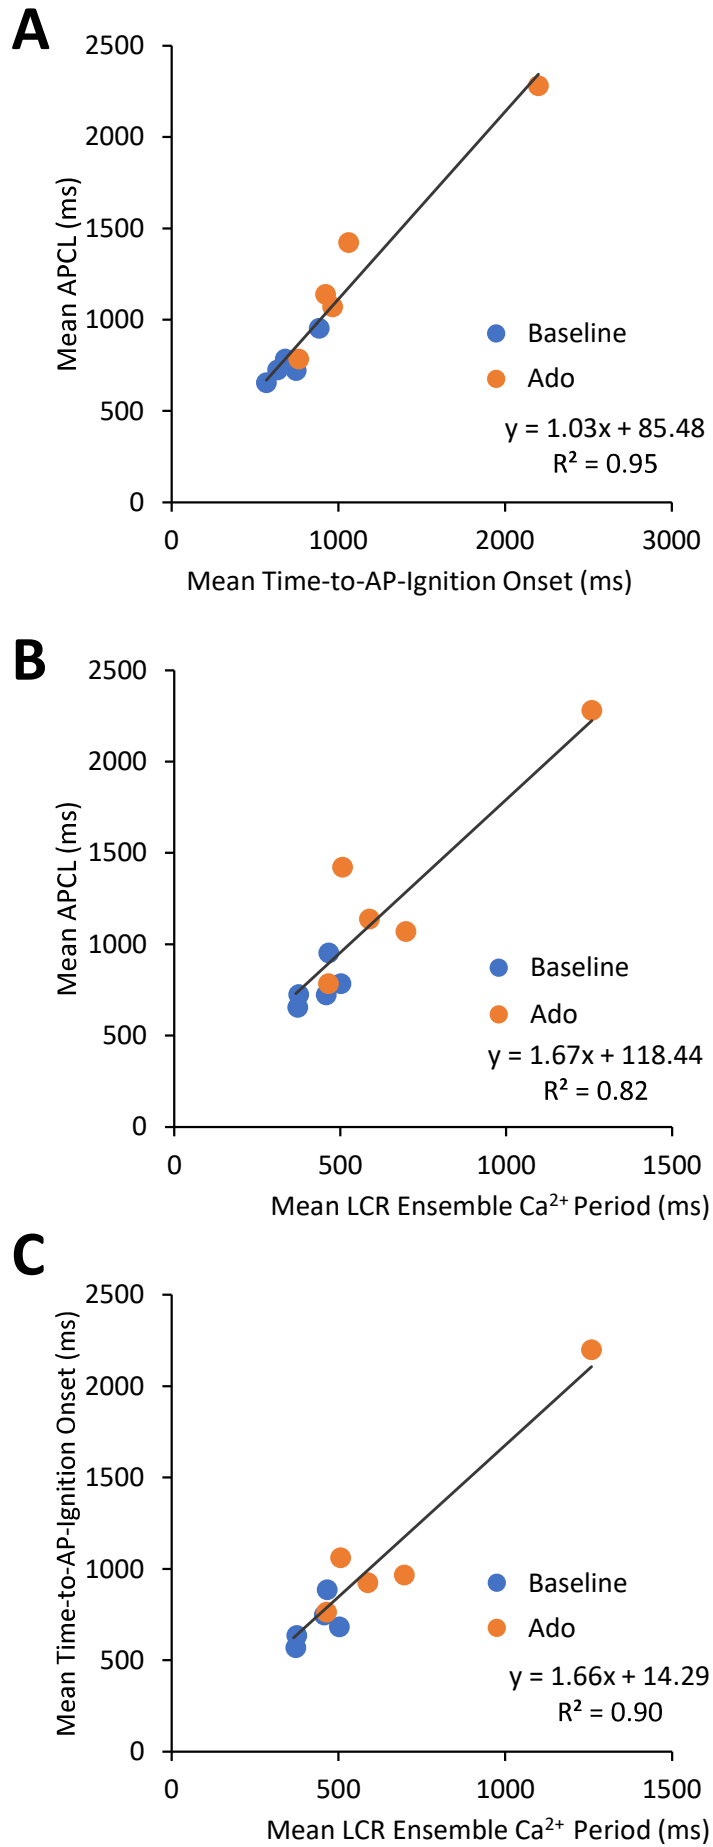

Figure 9

**A**

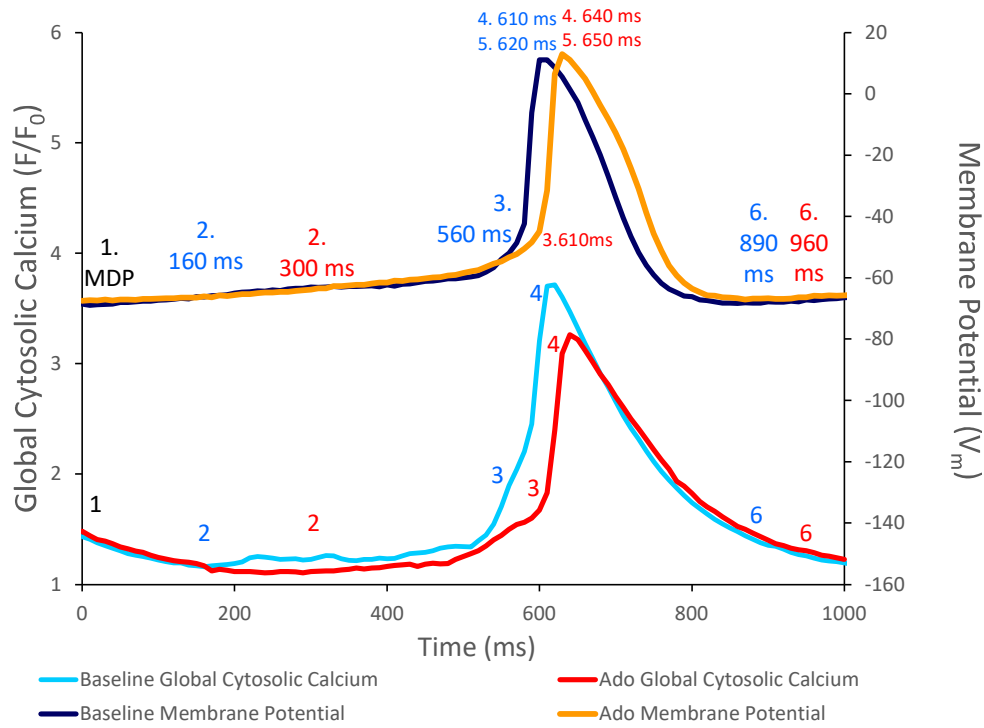

**B**

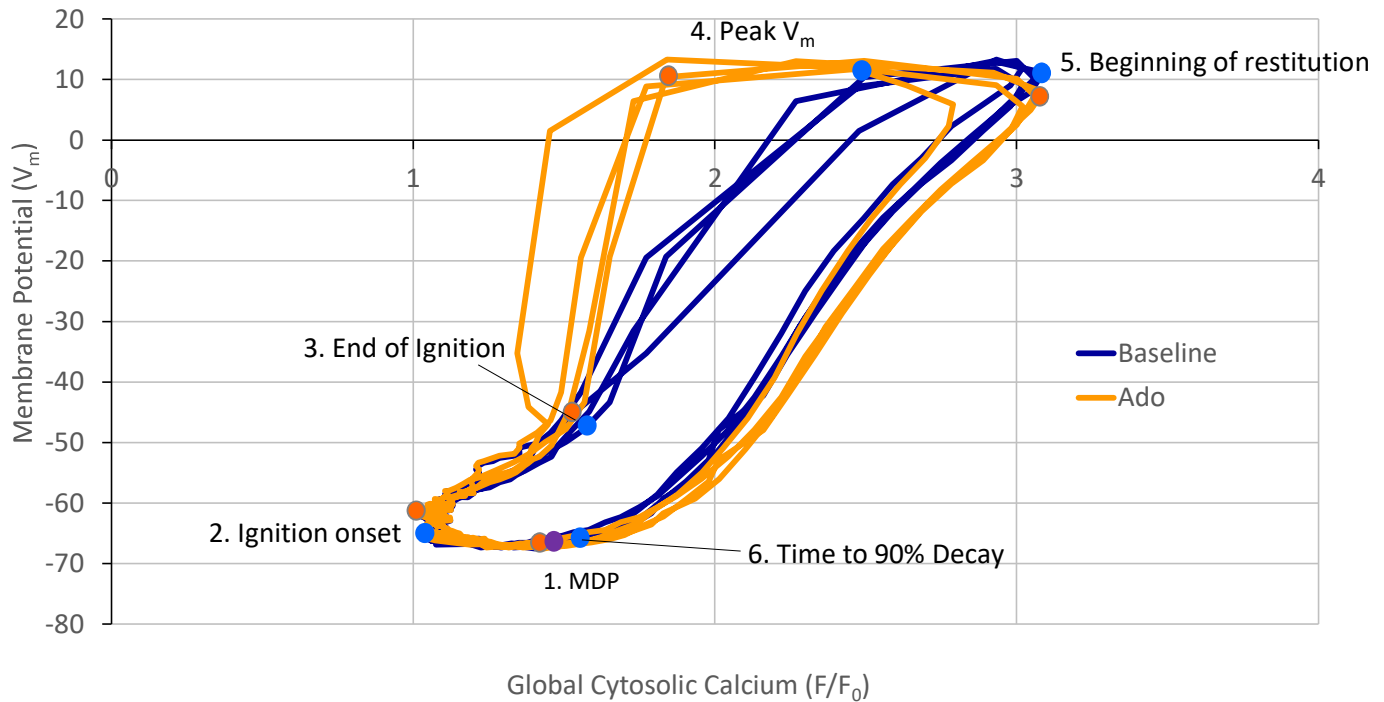

Figure 10

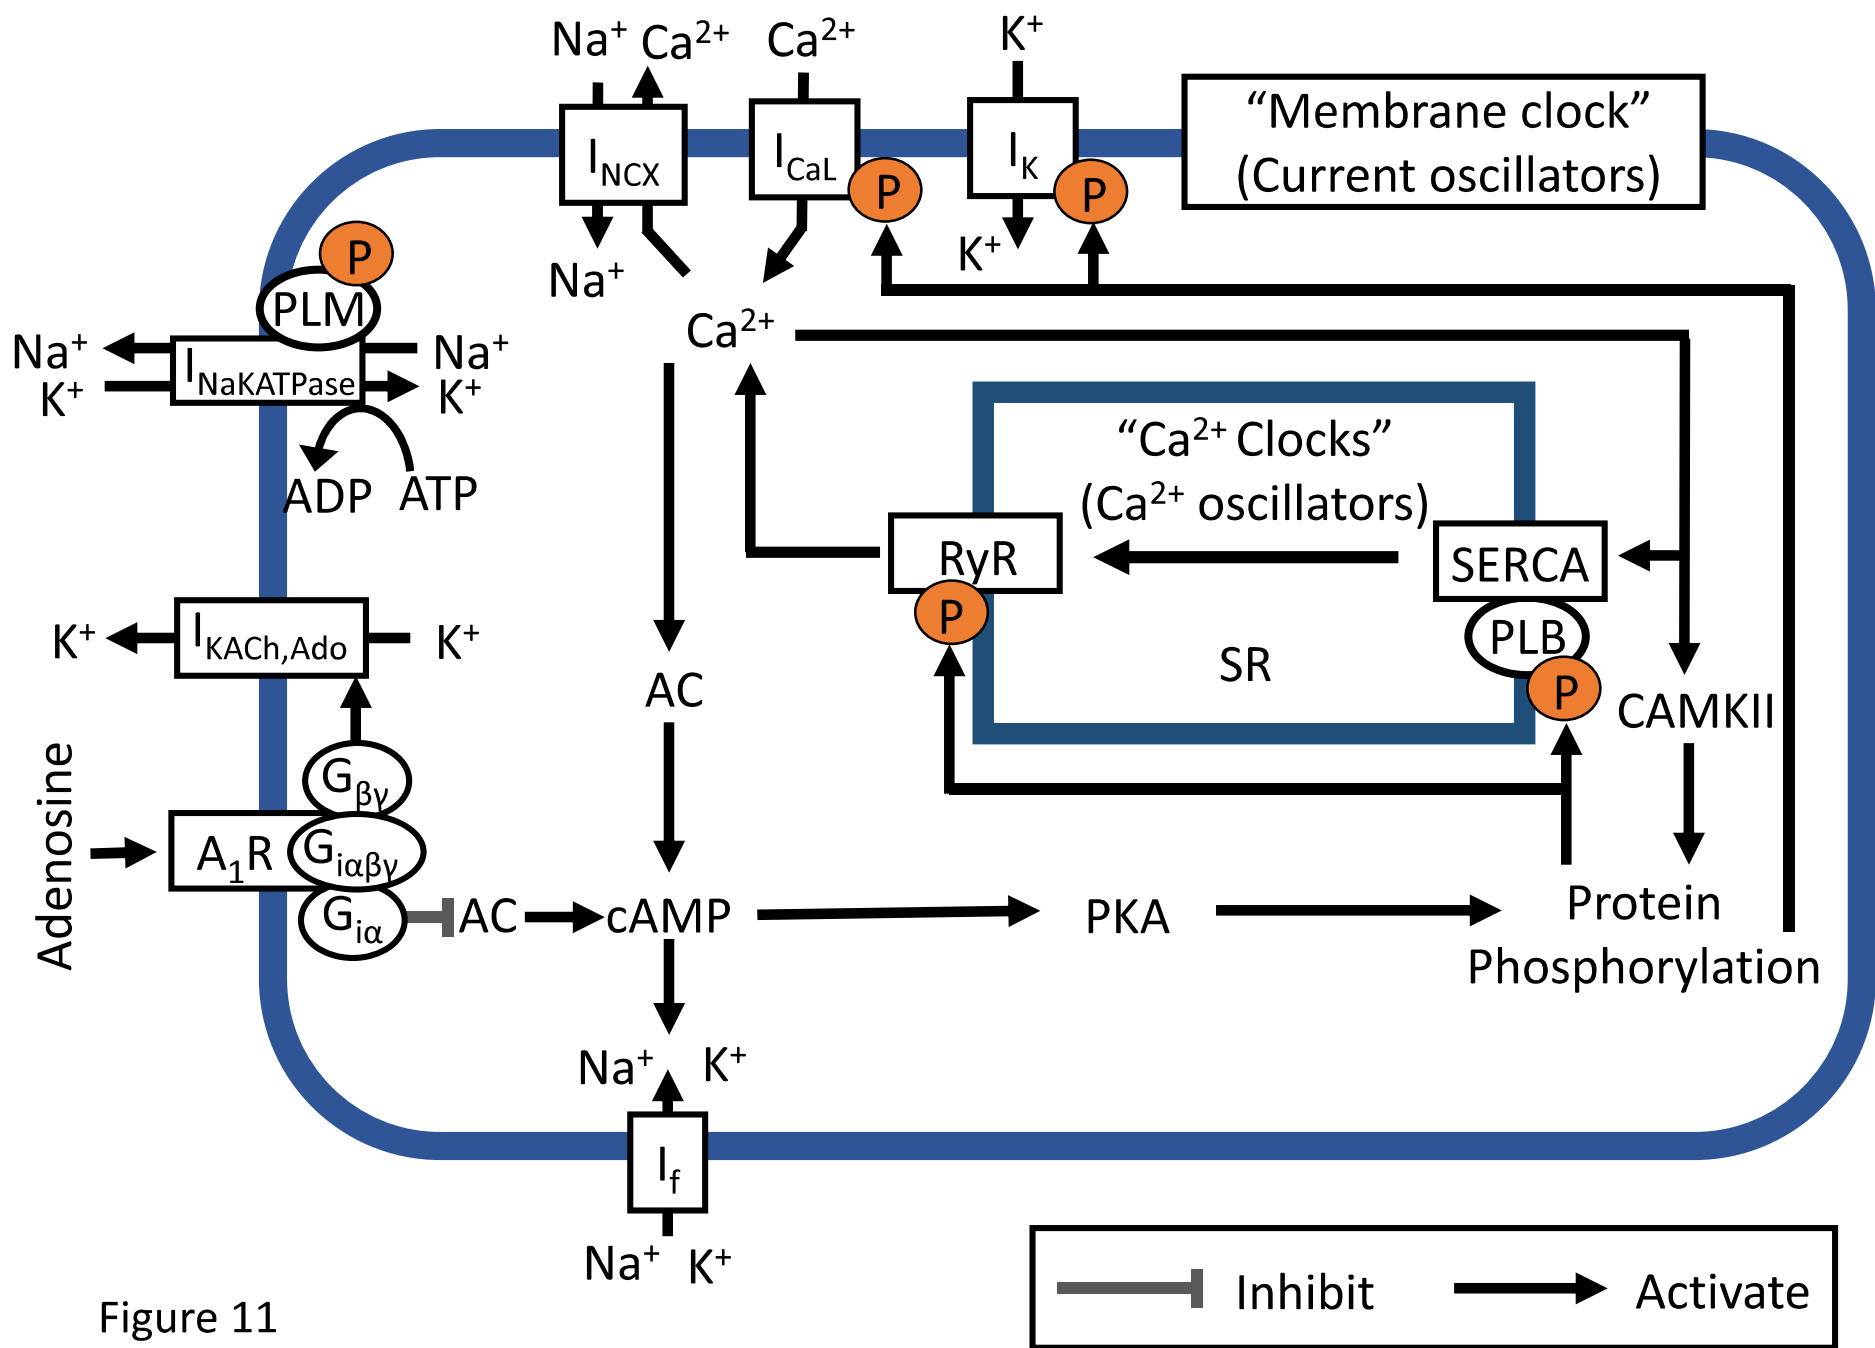

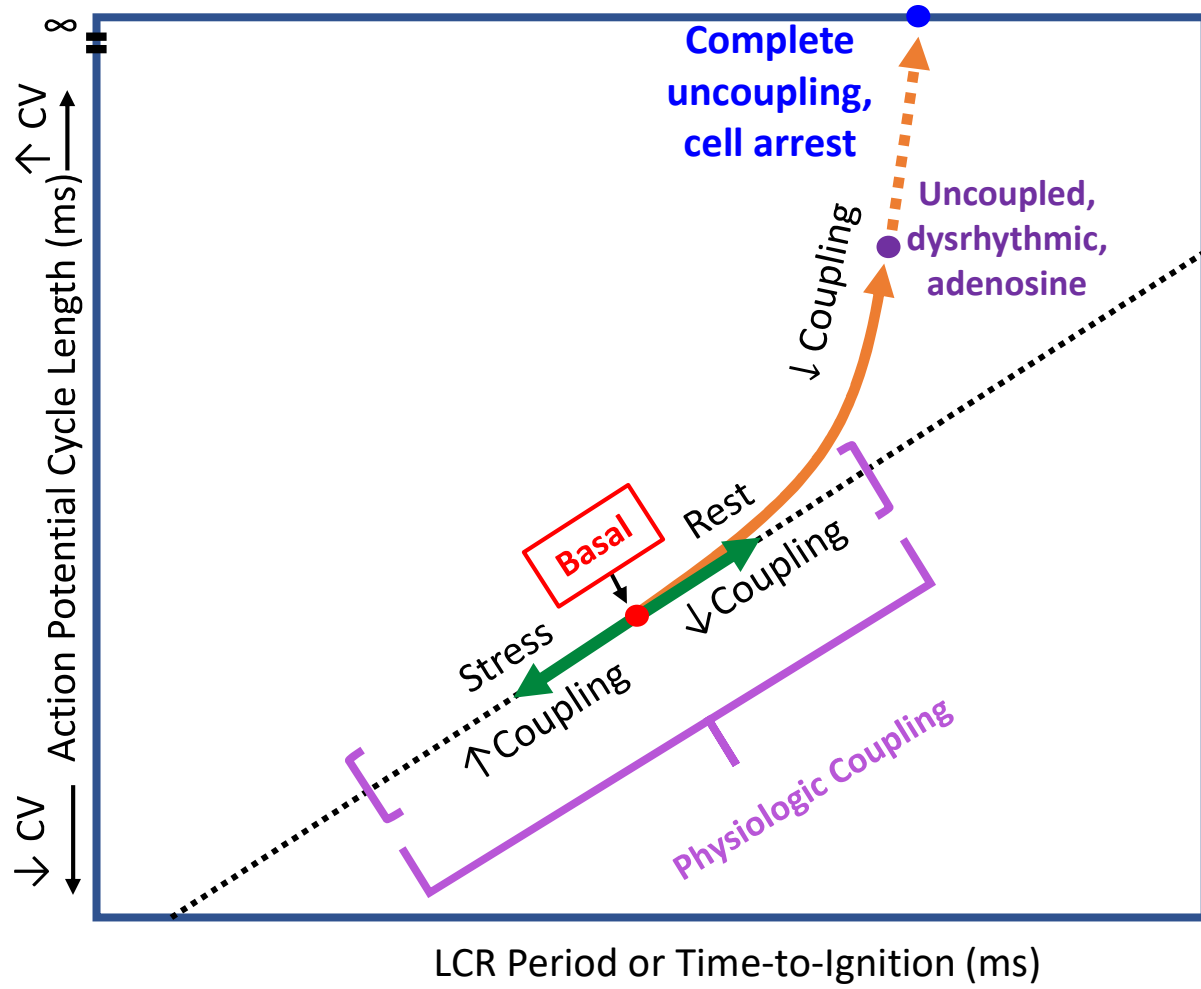

Figure 12

| <b>Parameters</b>                       | <b>Baseline<br/>(n=20)</b> | <b>Adenosine<br/>100nm<br/>(n=4)</b> | <b>Adenosine<br/>1<math>\mu</math>m<br/>(n=4)</b> | <b>Adenosine<br/>10<math>\mu</math>m<br/>(n=5)</b> | <b>Adenosine<br/>100<math>\mu</math>m<br/>(n=7)</b> |
|-----------------------------------------|----------------------------|--------------------------------------|---------------------------------------------------|----------------------------------------------------|-----------------------------------------------------|
| <b>SANC APCL (ms)</b>                   | 408 $\pm$ 70               | 435 $\pm$ 43*                        | 531 $\pm$ 65*                                     | 670 $\pm$ 277*                                     | 703 $\pm$ 222*                                      |
| <b>SANC APCL<br/>% Change</b>           | 100                        | 108 $\pm$ 7                          | 120 $\pm$ 11*                                     | 150 $\pm$ 34*                                      | 184 $\pm$ 48*                                       |
| <b>Coefficient of<br/>Variation (%)</b> | 4.9 $\pm$ 2.9              | 7.2 $\pm$ 2.8                        | 8.9 $\pm$ 6.7                                     | 12.1 $\pm$ 12.6                                    | 10.5 $\pm$ 7.9*                                     |

Table 1. *Adenosine slows SANC firing rate in a dose-dependent manner.* Calcium measurements of rhythmically firing SANC were taken before and after adenosine exposure. To minimize cell phototoxicity, different cells were used for each dose of adenosine. All SANC measured slowed down in response to adenosine. At each concentration of adenosine, the increase in APCL was significant ( $p < 0.05$ ).



| Condition             | n  | CL (ms)  | CV (%)   | MDP (mV)   | Ampl (mV) | dVdt <sub>max</sub> (V/s) | APD <sub>50</sub> (ms) | Mean DD Slope (mV/s) | TTI (ms)   | IP (mV)   | I <sub>Dur</sub> (ms) | TOP (mV)  |
|-----------------------|----|----------|----------|------------|-----------|---------------------------|------------------------|----------------------|------------|-----------|-----------------------|-----------|
| Baseline              | 10 | 492±88   | 5.1±1.7  | -64.1±5.6  | 89.8±9.1  | 3.7±1.1                   | 135±28                 | 43.0±18              | 478.5±164  | -56.5±8.1 | 24.6±10.5             | -59.0±6.7 |
| Ado                   | 10 | 687±178* | 7.2±2.0* | -67.7±4.8* | 97.2±9.2* | 3.9±1.4*                  | 141.6±22.3             | 22.8±9.8*            | 773.9±498* | -57.0±7.4 | 28.1±13.6*            | -59.4±5.9 |
| Ado,% of baseline     | 10 | 143±33*  | 142±36*  | 105±4.0*   | 110±7.8*  | 117±14*                   | 106±15                 | 58±25*               | 150±38*    | 101±3.4   | 112±16                | 101±3.4   |
| Washout               | 10 | 554±102  | 5.0±1.2  | -66.1±3.9  | 95.2±9.2* | 3.9±1.2*                  | 138.6±20.9             | 42.0±29.1            | 518.7±143  | -56.5±8.0 | 26.4±8.7              | -58.5±6.9 |
| Washout % of baseline | 10 | 109±13   | 104±31   | 104±6.9    | 108±9.5*  | 115±12*                   | 107±19                 | 100±38               | 111±16     | 100±11    | 109±25                | 101±11    |

Table 2. Membrane potential parameters recorded in this study. Panel A, action potential characteristics of SANC measured before, during, and after adenosine perfusion. The data obtained from 10 single SANCs isolated from five rabbit hearts. \*P < 0.05, compared to baseline by two-tailed paired t test. CL; cycle length max-to-max, CV; coefficient of variation, MDP; max diastolic potential, Ampl, amplitude; dVdt<sub>max</sub>, maximum upstroke velocity; TTI, time-to-ignition onset; IP, Ignition Potential; I<sub>Dur</sub>, Ignition Duration (from IP to TOP); Time to TOP (from MDP to TOP); TOP, take off potential.

|                            | n  | CL<br>(ms)   | CV (%)        | Time to Peak<br>Ca <sup>2+</sup> (ms) | Peak Ca <sup>2+</sup> (F/F <sub>0</sub> ) | Time to 90%<br>Decay (ms) |
|----------------------------|----|--------------|---------------|---------------------------------------|-------------------------------------------|---------------------------|
| Baseline                   | 40 | 540±129      | 5.0±2.2       | 493±115                               | 367±252                                   | 378±114                   |
| Adenosine                  | 40 | 950±331<br>* | 10.6±5.9<br>* | 833±338<br>*                          | 301±210<br>*                              | 707±335<br>*              |
| Adenosine<br>% of Baseline | 40 | 155±56<br>*  | 200±91<br>*   | 205±137<br>*                          | 84±23<br>*                                | 187±72<br>*               |

Table 3. AP-Induced Ca<sup>2+</sup> transient parameters measured in this study. Panel B, Ca<sup>2+</sup> measurements in SANC before and during adenosine perfusion (n=40). All cells measured were rhythmically firing at baseline. \*P < 0.05, compared to baseline by two-tailed paired t test.

| Condition         | n  | # of LCR Events/Sec | LCR Size ( $\mu\text{M}^2$ ) | LCR Duration (ms) | Mean LCR Ensemble ( $\mu\text{M}^2$ ) | Mean LCR Period (ms) | LCR Period SD (ms) |
|-------------------|----|---------------------|------------------------------|-------------------|---------------------------------------|----------------------|--------------------|
| Baseline          | 40 | 146 $\pm$ 75        | 7.4 $\pm$ 2.6                | 16.6 $\pm$ 3.4    | 986 $\pm$ 437                         | 370 $\pm$ 179        | 209 $\pm$ 107      |
| Ado               | 40 | 157 $\pm$ 68        | 5.6 $\pm$ 2.2*               | 14.8 $\pm$ 2.6*   | 770 $\pm$ 358*                        | 646 $\pm$ 320*       | 354.8 $\pm$ 171*   |
| Ado % of Baseline | 40 | 119 $\pm$ 42*       | 78 $\pm$ 19.0*               | 89.3 $\pm$ 6.5*   | 81 $\pm$ 22*                          | 184 $\pm$ 83*        | 185 $\pm$ 88*      |

Table 4. Local  $\text{Ca}^{2+}$  release parameters measured in this study. Panel B,  $\text{Ca}^{2+}$  measurements in SANC before and during adenosine superfusion (n=40). All cells measured were rhythmically firing at baseline. \*P < 0.05, compared to baseline by two-tailed paired t test.
